***Ehrlichia* SLiM ligand mimetic activates Hedgehog signaling to  
engage a BCL-2 anti-apoptotic cellular program**

Caitlan D. Byerly<sup>1</sup>, Shubhajit Mitra<sup>1</sup>, LaNisha L. Patterson<sup>1</sup>, Nicholas A. Pittner<sup>1</sup>,  
Thangam S. Velayutham<sup>1</sup>, Slobodan Paessler<sup>1,6</sup>, Veljko Veljkovic<sup>6</sup>,  
and Jere W. McBride<sup>1-5 #</sup>

Departments of Pathology<sup>1</sup> and Microbiology and Immunology,<sup>2</sup>

Center for Biodefense and Emerging Infectious Diseases,<sup>3</sup>

Sealy Institute for Vaccine Sciences<sup>4</sup> and

Institute for Human Infections and Immunity<sup>5</sup>

University of Texas Medical Branch, Galveston, Texas, USA

Biomed Protection, LLC, Galveston, Texas, USA<sup>6</sup>

**Running Title:** *Ehrlichia* SLiM activation of Hedgehog signaling

Corresponding author:

Jere W. McBride, Ph.D.

Department of Pathology

University of Texas Medical Branch

Galveston, TX 77555-0609

Tel: (409) 747-2498

Email: [jemcbrid@utmb.edu](mailto:jemcbrid@utmb.edu)

## 1 **Abstract**

2 *Ehrlichia chaffeensis* (*E. chaffeensis*) has evolved eukaryotic ligand mimicry to  
3 repurposes multiple cellular signaling pathways for immune evasion. In this  
4 investigation, we demonstrate that TRP120 has a novel repetitive short liner motif  
5 (SLiM) that activates the evolutionarily conserved Hedgehog (Hh) signaling pathway to  
6 inhibit apoptosis. *In silico* analysis revealed that TRP120 has sequence and functional  
7 similarity with Hh ligands and a candidate Hh ligand SLiM was identified. siRNA  
8 knockdown of Hh signaling and transcriptional components significantly reduced  
9 infection. Co-immunoprecipitation and surface plasmon resonance demonstrated that  
10 rTRP120-TR interacted directly with Hh receptor Patched-2 (PTCH2). *E. chaffeensis*  
11 infection resulted in early activation of Hh transcription factor GLI-1 and upregulation of  
12 Hh target genes. Moreover, soluble recombinant TRP120 (rTRP120) activated Hh and  
13 induced gene expression consistent with the eukaryotic Hh ligand. The TRP120 Hh  
14 SLiM (NPEVLIKD) induced nuclear translocation of GLI-1 in THP-1 cells and primary  
15 human monocytes and induced a rapid and expansive activation of Hh pathway target  
16 genes. Furthermore, Hh activation was blocked by an  $\alpha$ -TRP120 Hh SLiM antibody.  
17 TRP120 Hh SLiM significantly increased levels of Hh target, anti-apoptotic protein B-cell  
18 lymphoma 2 (BCL-2), and siRNA knockdown of BCL-2 dramatically inhibited infection.  
19 Blocking Hh signaling with the inhibitor Vismodegib, induced a pro-apoptotic cellular  
20 program defined by decreased mitochondria membrane potential, significant reductions  
21 in BCL-2, activation of caspase 3 and 9, and increased apoptotic cells. This study  
22 reveals a novel *E. chaffeensis* SLiM ligand mimetic that activates Hh signaling to  
23 maintain *E. chaffeensis* infection by engaging a BCL-2 anti-apoptotic cellular program.

24 **Author summary**

25 *Ehrlichia chaffeensis* is an obligately intracellular bacterium that preferentially infects  
26 and replicates within mononuclear phagocytes and survives intracellularly by  
27 modulating cellular signaling pathways to subvert innate immune defenses. This  
28 investigation reveals the complex and expanding role that the *E. chaffeensis* TRP120  
29 moonlighting effector and SLiM ligand mimetics have on immune subversion and  
30 infection through activation and regulation of evolutionarily conserved signaling  
31 pathways. Herein, we define a TRP120 Hh SLiM mimetic that induces Hh signaling and  
32 regulates the anti-apoptotic protein BCL-2 to prevent sequential activation of caspase 9  
33 and 3, promoting *E. chaffeensis* infection. This study defines a novel prokaryotic SLiM  
34 mimetic that repurposes evolutionarily conserved eukaryotic signaling pathways to  
35 promote survival of an intracellular bacterium.

## 36 **Introduction**

37 *Ehrlichia chaffeensis* (*E. chaffeensis*) is an obligately intracellular tick-borne rickettsial  
38 pathogen and the etiologic agent of human monocytotropic ehrlichiosis (HME), an  
39 emerging, life-threatening zoonosis. Mononuclear phagocytes are preferentially  
40 infected by *E. chaffeensis*, where it replicates in early endosome-like host membrane-  
41 derived cytoplasmic vacuoles and completes a biphasic intracellular life cycle (1).  
42 During infection, *E. chaffeensis* secretes well characterized tandem repeat protein  
43 (TRP) effectors via the type 1 secretion system (T1SS) which interact with a diverse  
44 array of host proteins (2). TRP-host interactions rewire fundamental host cell processes  
45 such as gene transcription and activation of conserved cellular signaling pathways (Wnt  
46 and Notch), through interactions that involve post-translational modifications and SLiM  
47 mimicry in order to reprogram the host cell and subvert innate immune defenses (3-9).  
48  
49 *Ehrlichia chaffeensis* TRP120 has been recognized as a moonlighting protein that has  
50 multiple roles during infection (10). Initially, TRP120 was identified as a major  
51 immunoreactive protein, but was later detected in the nucleus where it functions as a  
52 nucleomodulin. Subsequently, yeast-2-hybrid (Y2H) studies identified a multitude of  
53 molecular interactions between TRP120 and eukaryotic proteins involved in various  
54 cellular processes, including cell signaling, transcriptional regulation, PTMs and  
55 apoptosis (3). Recently, multiple TRP120 functions that have been well defined  
56 including DNA binding (11), HECT E3 ubiquitin ligase activity (6, 8, 12), and ligand  
57 mimicry (7). Notably, TRP120 engages Notch and Wnt receptors to activate conserved  
58 Notch and Wnt signaling through SLiM ligand mimicry (7, 9). SLiM ligand mimicry and

59 post translational modification (PTM) SLiMs have been well characterized in bacteria  
60 and viruses (7, 13, 14). However, examples of interkingdom Hedgehog (Hh) SLiM  
61 mimicry have never been reported.

62

63 The Hh pathway is an evolutionarily conserved signaling pathway that plays a crucial  
64 role in embryogenesis (15). The pathway was first identified in *Drosophila* and  
65 extensively studied in the field of developmental biology for its role in segment polarity  
66 and body patterning during embryogenesis (16). Hh signaling components are highly  
67 conserved in vertebrates and invertebrates, but the key difference is in pathway  
68 redundancy (17). In *Drosophila* there is one ligand (Hh), one primary receptor (PTC)  
69 and one transcription factor (Ci). However, in mammals the Hh pathway has three  
70 families of ligands: Sonic hedgehog (Shh); Indian hedgehog (Ihh) and Desert hedgehog  
71 (Dhh) two primary receptors (PTCH1 and PTCH2) and three transcription factors (GLI-  
72 1, GLI-2, and GLI-3). (18, 19). Hh signaling is initiated by the Hh ligand binding to the  
73 Hh receptor Patched (PTCH). This interaction counters PTCH-mediated repression of  
74 Smoothed (SMO) and activates the only known transcriptional mediators, the GLI  
75 family of Hh transcription factors (20). Regardless, the signal is relayed from external  
76 milieu to nucleus in a moderately conserved way (16). In humans, the Hh pathway is  
77 involved in maintaining tissue homeostasis, and aberrant activation of this pathway  
78 results in the formation of various tumors and hematological malignancies (21, 22). Hh  
79 has also been identified as a key regulator in maintaining tissue homeostasis and  
80 remodeling due to various roles associated with cell proliferation, angiogenesis, B and T  
81 cell development, regulation of immune response, autophagy and cellular apoptosis

82 (23). Notably, evolutionary conserved signaling pathways such as Hh are known to be  
83 engaged by pathogens. Viral and bacterial pathogens including Hepatitis B and C (HBV  
84 and HCV, respectively), Epstein–Barr virus (EBV), Influenza A virus, *Helicobacter pylori*,  
85 and *Mycobacterium bovis* have recently been reported to modulate Hh signaling during  
86 infection (19). As cellular apoptosis is highly regulated by Hh (24), exploiting the Hh  
87 pathway may be an important strategy for intracellular pathogens to enhance host cell  
88 survival to promote intracellular infection (25).

89  
90 Apoptosis is the default programmed cell death mode for organ development during  
91 embryogenesis and has emerged as one of the major pathways controlled by Hh  
92 signaling (23, 26). Moreover, apoptosis also plays an important role in host immune  
93 defense during microbial infections, triggering the sequential activation of caspases, in  
94 response to either an extrinsic or intrinsic death signal (27). The release of cytochrome  
95 c from the mitochondria initiates the intrinsic apoptotic pathway and results in  
96 cytochrome c association with apoptotic protease activating factor 1 (Apaf-1) and  
97 procaspase 9 to form the apoptosome, a multimeric protein complex involved in  
98 cleavage of inactive caspase 9 into the active form (28). Caspase 9 cleaves procaspase  
99 3, to form active caspase 3, which is essential for chromatin condensation and DNA  
100 fragmentation in all apoptotic cells (29). One of the major anti-apoptotic transcriptional  
101 targets of GLI-1 is BCL-2, which is essential in inhibiting apoptosis inducer Bax (30, 31).  
102 The anti-apoptotic members of the BCL-2 family maintain mitochondrial membrane  
103 integrity by sequestering BH3-only proteins like Bax and Bak to inhibit the release of  
104 cytochrome c from mitochondria, thereby inhibiting apoptosis (32). Moreover, *E.*

105 *chaffeensis* influences the transcriptional activity of other Hh-targeted anti-apoptotic  
106 genes such as *BCL2A*, *MCL1*, and *BIRC3* (8, 33, 34).

107

108 This investigation reveals a novel host-pathogen strategy, whereby *E. chaffeensis*  
109 utilizes eukaryotic SLiM mimicry to exploit Hh signaling to activate an anti-apoptotic  
110 cellular program. We determined that *E. chaffeensis* TRP120 directly interacts with Hh  
111 receptor, PTCH2 and Hh signaling is activated through a Hh ligand SLiM mimetic.  
112 Furthermore, we analyzed the role of Hh signaling in regulating apoptosis during  
113 infection and demonstrate that *E. chaffeensis* exploits Hh signaling to engage BCL-2  
114 and inhibit apoptosis during infection.

115

## 116 **Results**

### 117 ***E. chaffeensis* TRP120 contains a predicted Hh ligand SLiM.**

118 TRP120 contains a tandem repeat domain (TRD) centered between the N- and C-  
119 terminal domains. Various functional SLiMs have been reported within the N terminus,  
120 TRD, and C terminus that are relevant to *E. chaffeensis* infection, including  
121 posttranslational modification motifs, DNA-binding motifs, and ubiquitin ligase catalytic  
122 motifs (7). We previously reported that TRP120 stimulation results in transcriptional  
123 upregulation of *GLI-1* in THP-1 cells (4). Moreover, during *E. chaffeensis* infection Wnt  
124 and Notch signaling pathways are activated through ligand mimicry via TRP120 Wnt  
125 and Notch SLiMs (4, 7, 9, 10). Since GLI-1 is a major transcriptional factor of the Hh-  
126 signaling pathway and often cross-talks with Wnt and Notch signaling (35, 36), we  
127 investigated the possibility of Hh pathway activation during *E. chaffeensis* infection.

128 Using NCBI Protein BLAST and ISM analysis, we determined that TRP120 has  
129 sequence homology and functional similarity with Hh ligands respectively within the  
130 TRD (**Fig. 1**). Specifically, the homologous TRP120 Hh sequence (NPEVLIKD) present  
131 in each TR is 87% similar to the Hh ligand sequence that is associated with the Hh-  
132 PTCH binding site (37). In addition, the homologous TRP120 Hh sequence is 8 aa,  
133 consistent in length with other known SLiMs (**Fig. 1A**). Therefore, the homologous  
134 TRP120 Hh sequence was designated as the TRP120 Hh SLiM.

135

136 While sequence homology can be a useful tool to determine whether a bacterial protein  
137 may mimic a eukaryotic motif, amino acid sequence homology does not suggest  
138 functional similarity. To predict functional similarity between TRP120 and Hh ligands, we  
139 performed an information spectrum method (ISM) analysis comparing TRP120 to Dhh  
140 and Ihh (**Fig. 1B-D**). ISM analysis is performed *in silico* to identify shared characteristics  
141 between two molecules by predicting similar long-wave frequency vibrations that dictate  
142 various protein functions (38). TRP120-Dhh (**Fig. 1B**) and TRP120-Ihh (**Fig. 1C**) ISM  
143 cross-spectrum electron-ion interaction potentials (EEIP) detected significant peak  
144 amplitude at frequency 0.457, indicating a shared biological function between TRP120  
145 with Dhh and Ihh in the same region. Scanning the EEIP sequence of TRP120 along  
146 the peak amplitude frequency identified the amino acids contributing to shared  
147 biological function between TRP120 with Dhh and Ihh. The shared biological function  
148 resides in the TRD of TRP120, immediately upstream of the predicted TRP120 Hh SLiM  
149 (**Fig. 1D**). Together, the BLAST and ISM analysis results suggest that TRP120 contains



150 a Hh SLiM within the TRD that has sequence similarity with the receptor-binding site of  
151 Hh ligands and is predicted to have functional similarity with Hh ligands by ISM.

152

### 153 **Hh signaling components are required for *E. chaffeensis* survival.**

154 The Hh signaling pathway is not only required during embryogenesis, but also plays a  
155 major role in determining cell fate in adult hematopoietic cells. Since Hh signaling is  
156 involved in different cellular processes like autophagy and apoptosis (39, 40), which are  
157 crucial for ehrlichial intracellular survival (41), we examined the effect of Hh signaling  
158 inhibition on *E. chaffeensis* infection using iRNA to individually target and silence *GLI-*  
159 *1/2/3*, *PTCH1*, *PTCH2* and *SMO* in THP-1 cells. *E. chaffeensis* infection (depicted by  
160 *dsb* levels) was significantly reduced in nearly all transfection groups 24 post  
161 transfection of siRNA (excluding *PTCH1*-KD cells), relative to the infection level in  
162 scrambled siRNA-transfected cells (**Fig. 2A**). The most significant impact on *E.*  
163 *chaffeensis* infection occurred in *GLI-1-*, *PTCH2-* and *SMO*-KD cells. Loss of *PTCH2*  
164 receptor significantly reduced infection, while loss of *PTCH1* receptor did not,  
165 suggesting that *E. chaffeensis* may preferentially target *PTCH2* during infection.

166

### 167 **TRP120 interacts with Hh receptor *PTCH2*.**

168 Hh signaling initiates when a Hh ligand binds to the *PTCH* receptor, disengaging *PTCH-*  
169 mediated inhibition of *SMO*, which results in nuclear translocation of the full-length *GLI-*  
170 *1* transcription factor and subsequent activation of Hh pathway target genes (17). A Hh  
171 SLiM mimetic was identified and iRNA KD studies performed suggests that *E.*  
172 *chaffeensis* interacts with *PTCH2* for Hh activation. Based on these results, we

173 hypothesized that TRP120 is a Hh ligand mimic that directly interacts with PTCH2. To  
174 examine the cellular distribution and colocalization of PTCH2 with the TRP120-  
175 expressing ehrlichial inclusions, cells were stained with anti-PTCH2 and anti-TRP120  
176 specific antibody and observed by immunofluorescence microscopy. We found a mostly  
177 punctate distribution of PTCH2 receptors in uninfected THP-1 cells; however, in infected  
178 cells, we found colocalization of PTCH2 with morulae expressing TRP120 (**Fig 3A**).  
179 Intensity correlation analysis using ImageJ demonstrated a strong Pierson's correlation  
180 coefficient (PCC=0.866) between PTCH2 and TRP120. In addition, colocalization of  
181 native PTCH2 receptor and ectopically expressed GFP-TRP120 in transfected HeLa  
182 cells supports that an interaction exists between TRP120 and PTCH2 (**Fig 3B**). Since  
183 these data only indicate TRP120 colocalization with PTCH2, we performed two protein-  
184 interaction assays, including Co-IP and surface plasmon resonance (SPR). We  
185 confirmed the direct interaction between TRP120 and PTCH2 by immunoprecipitating  
186 TRP120 or PTCH2 (reverse Co-IP) from the lysate of infected THP-1 cells harvested at  
187 0 hpi (uninfected control) and 24 hpi, which ensured that sufficient levels of TRP120  
188 were present (**Fig. 3C**). An interaction between PTCH2 and TRP120 was detected with  
189 Co-IP which was also demonstrated with reverse Co-IP. Additionally, SPR was utilized  
190 to confirm a direct interaction between TRP120 TRD and PTCH2 and determine the  
191 binding affinity (**Fig. 3D**). A strong interaction between rPTCH2 and rTRP120-TR ( $K_D =$   
192  $4.40 \pm 1.5$  nM) was detected compared to the negative control ( $K_D = 0$ ). These data  
193 demonstrate that TRP120 directly interacts with PTCH2 via the TRD (**Fig. 3**), which  
194 contains both sequence and functional similarity with Hh ligands (**Fig. 1**). These results  
195 identified PTCH2 as a receptor for TRP120.

196

197 ***E. chaffeensis* activates the Hh signaling pathway in THP-1 cells and PHMs.**

198 Hh signal initiates at the plasma membrane when Hh ligands interacts with the 12-pass-  
199 transmembrane PTCH receptor. The Hh ligand-PTCH interaction results in increased  
200 expression of cell surface receptor SMO, decreased levels in the cytoplasmic negative  
201 regulator SUFU, and subsequent activation and nuclear translocation of Hh transcription  
202 factor, GLI-1 (42-44). We predicted an *E. chaffeensis* TRP120 Hh SLiM and identified a  
203 direct interaction between TRP120 and PTCH2 during infection. Additionally, we  
204 previously reported that TRP120 stimulation results in transcriptional upregulation of  
205 *GLI-1* in THP-1 cells (4). However, the role of *E. chaffeensis* in activating the Hh  
206 signaling pathway has not been defined. Hence, we investigated whether *E. chaffeensis*  
207 activates GLI-1 in THP-1 cells and PHMs via confocal microscopy (**Fig. 4**). We first  
208 determined that *E. chaffeensis* stimulates GLI-1 activation and nuclear translocation in  
209 THP-1 cells. GLI-1 was detected in the nucleus within 2 hpi, and progressive nuclear  
210 accumulation of GLI-1 was observed over 48 hpi compared to uninfected controls at  
211 respective timepoints (**Fig. 4A**). Further, *E. chaffeensis*-infected PHMs stimulated GLI-1  
212 activation and nuclear translocation at 10 hpi compared to the uninfected control, which  
213 provided further evidence that *E. chaffeensis* activates Hh signaling (**Fig 4B**).

214 **Expression array analysis of Hh-signaling genes during *E. chaffeensis* infection.**

215 To further examine the role of *E. chaffeensis* in Hh pathway activation, we examined Hh  
216 pathway gene transcription during *E. chaffeensis* infection. A transcriptional analysis  
217 was performed using a human Hh signaling PCR array, including Hh components,  
218 putative targets, and auxiliary genes at 4h, 8h, 24h and 48 hpi (**Fig. 5**). Volcano plots  
219 generated from data set at 4h, 8h, 24h, and 48 hpi depict a differential expression  
220 pattern of Hh signaling pathway genes in the *E. chaffeensis*-infected cells compared to  
221 uninfected cells (**Fig. 5A**). Significant activation of Hh pathway regulator, component,  
222 and target genes was detected between 4h, 8h, 24h, and 48 hpi. Only a small number  
223 of Hh-associated genes were negatively regulated during infection. The expression  
224 patterns of genes that showed a consistent and a significant upregulation throughout all  
225 different time points included Hh pathway regulators: *BOC*, *CDON*, *BTRC*, *CSNK1E*  
226 and *PRKACA*; Hh signaling pathway auxiliary genes: *LATS1*, *MAPK1* and *NF2* and the  
227 Hh pathway target genes: *MTSS1*, *WNT10A*, *WNT3*, *WNT9a* and *VEGFA*. The core Hh  
228 signaling pathway receptor genes like *PTCH1*, *PTCH2* and *SMO* were highly expressed  
229 during early and late time points, suggesting high pathway activity throughout *E.*  
230 *chaffeensis* infection. One of the major anti-apoptotic genes and a major target of Shh-  
231 signaling pathway *BCL2* showed transcriptional upregulation at 24 and 48 hpi  
232 suggesting a crucial role of Hh signaling pathway in inhibition of host cell apoptosis  
233 during *E. chaffeensis* infection. The normalized expression of selected genes in the Hh  
234 PCR array between infected and uninfected cells at 48 hpi is shown in **Fig. 5B**.  
235 We also confirmed immunofluorescence results by immunoblot by probing nuclear  
236 fractions of uninfected and *E. chaffeensis*-infected THP-1 cells with GLI-1 specific

237 antibody. Progressive nuclear accumulation of GLI-1 was observed over 48 hpi (**Fig**  
238 **6A**). In addition, we tested cytoplasmic fractions of SMO during *E. chaffeensis*-infection  
239 and found induced SMO protein expression during infection. In addition, we also  
240 detected decreased protein expression of cytoplasmic GLI-1 negative regulator SUFU  
241 and increased protein expression of Shh in *E. ch.*-infected THP-1 cytoplasmic fractions  
242 (**Fig. 6B**). Collectively, these data demonstrates that *E. chaffeensis* activates the Hh-  
243 signaling pathway during infection.

244

#### 245 **TRP120 activates GLI-1 and Hh gene expression consistent with Hh ligands.**

246 To further examine the role of TRP120 in Hh pathway activation, purified rTRP120-FL (1  
247 µg/ml) was used to stimulate THP-1 cells and PHMs, and cellular expression and  
248 distribution of GLI-1 were monitored using confocal microscopy (**Fig. 7A-B**). GL-1  
249 activation, accumulation and nuclear translocation was observed in THP-1 cells (**Fig.**  
250 **6A**) and PHMs (**Fig. 7B**) at 6 h and 10 hpt, respectively. THP-1 cells and PHMs treated  
251 with rTRP120-FL demonstrated clear GLI-1 activation, similarly to recombinant Shh  
252 (rShh), which was used as a positive control. To further confirm the role of TRP120 in  
253 activation of the Hh pathway, cells were stimulated with rTRP120-FL or rShh for 24 h,  
254 and transcriptional analysis was performed using a human Hh signaling PCR array  
255 (**Fig. 7C-D**). The volcano plot represents gene expression patterns of all 84 genes in Hh  
256 signaling PCR array in cells stimulated with rTRP120-FL normalized to negative control  
257 cells treated with rTrx. A significant increase in 15 Hh genes, including Hh pathway  
258 associated receptors, and cofactors (*PTCH2*, *SMO*, *CDON* and *LRP2*), regulators  
259 (*BTRC*, *CSNK1E* and *PRKACA*), transcription factor (*GLI1*), and target genes

260 (*WNT10A*, *WNT6*, *WNT2B* and *WNT4*) was detected (**Fig. 7C**). In addition, 2 genes  
261 (*WIF1* and *GAS1*) were downregulated compared to the control (**Fig. 7C**). In  
262 comparison, cells treated with rShh had a significant increase in 17 genes in the Hh  
263 pathway array (**Fig. 7D**). Though there were differential expression pattern of genes in  
264 TRP120 and Shh treated cells, we found 8 Hh pathway-associated genes including  
265 (*PTCH2*, *SMO*, *GLI1*, *CSNK1E*, and *LRP2*) and target genes (*WNT10A*, *WNT4*, and  
266 *WNT6*) were upregulated in both rTRP120-FL and rShh treatment. Together these data  
267 demonstrate that TRP120 independently and efficiently activates the Hh signaling  
268 pathway.

269

#### 270 **TRP120 Hh SLiM activates GLI-1 in THP-1 cells and PHMs.**

271 We next investigated if the predicted TRP120 Hh SLiM sequence (NPEVLIKD) was  
272 sufficient in activating Hh signaling (**Fig. 8**). A table was used to reveal various TPR120  
273 peptide sequences within the TRP120 TRD domain. TRP120-TR-Hh (20 aa) and  
274 TRP120-Hh-SLiM (8 aa) sequences contain the TRP120 Hh homology sequence. More  
275 specifically, the TRP120-Hh-SLiM sequence is the sequence that was specifically  
276 defined through BLAST analysis. TRP120-Hh-SLiM-mut (18 aa) is a corresponding  
277 mutant peptide with guanine and adenine substitutions that replace the TRP120 Hh  
278 SLiM aa's. TRP120-TR (-) (22 aa) is a TRP120 TRD sequence that does not contain the  
279 defined Hh homology sequence (**Fig. 8A**). THP-1 cells were treated with TRP120-TR-  
280 Hh, TRP120-TR (-), TRP120-Hh-SLiM or TRP120-Hh-SLiM-mut for 6 h, and GLI-1  
281 signaling was measured as described. Both TRP120-TR-Hh and TRP120-Hh-SLiM  
282 treatments elicited a significant increase in GLI-1 activity, while TRP120-TR (-) and

283 TRP120-Hh-SLiM-mut control could not activate GLI-1 (**Fig. 8B**). Similarly, TRP120-Hh-  
284 SLiM treatment elicited a significant increase in GLI-1 activity in PHMs at 10 hpt, but  
285 TRP120-Hh-SLiM-mut did not (**Fig. 8C**). Additionally, THP-1 cells treated with 50 ng/mL  
286 or 500 ng/mL of TRP120-Hh-SLiM exhibited Hh gene regulation in a concentration  
287 dependent manner (**Fig. 8D-E**). TRP120-Hh-SLiM significantly activated Hh target  
288 genes at 24 hpt compared to untreated (**Fig. 8D**) and TRP120-Hh-SLiM-mut treated  
289 (**Fig. 8E**) cells, including *BOC*, *CDON*, *BTRC*, *CSNK1E*, *PTCH1*, *PTCH2*, *SMO*,  
290 *PRKACA*, *LATS1*, *MAPK1*, *NF2*, *MTSS1*, *WNT10A*, *WNT3*, *WNT9a*, *VEGFA* and *BCL2*  
291 as described during *E. chaffeensis* infection. These data demonstrate that the defined  
292 TRP120 Hh SLiM activates the Hh signaling pathway and regulates Hh pathway target  
293 genes. During *E. chaffeensis* infection, we identified similar Hh activity *in vitro* using the  
294 THP-1 cell line as well as *ex vivo* with PHMs. Establishing that the responses observed  
295 in the THP-1 cells are similarly observed in PHMs cultured *ex vivo*, which is important  
296 because of the limited lifespan of primary cells and the advantages of using THP-1 cell  
297 line for functional laboratory studies that may serve as a foundation for understanding  
298 mechanisms and potential therapeutics that could be used for treatment in patients.  
299

### 300 **A TRP120 Hh SLiM targeted antibody blocks Hedgehog signaling.**

301 To elucidate the role of the TRP120 Hh SLiM during *E. chaffeensis* infection, we  
302 investigated whether blocking *E. chaffeensis* infection or the TRP120 Hh SLiM with a  
303 TRP120 Hh SLiM targeted antibody would inhibit Hh signaling. We used a neutralization  
304 assay to determine antibody effects on Hh signaling during *E. chaffeensis* infection or  
305 TRP120-Hh-SLiM treatment. *E. chaffeensis* or TRP120-Hh-SLiM were incubated with

306 1.5 µg/mL of either α-TRP120-I1 antibody (targets TRP120 sequence  
307 SKVEQEETNPEVLIKDLQDVAS) or α-TRP32 antibody (control) for 1 h and then THP-1  
308 cells were subsequently treated with each mixture for 10 h. *E. chaffeensis* infected and  
309 TRP120-Hh-SLiM treated cells in the presence of α-TRP120-I1 demonstrated significant  
310 reduction in GLI-1 activation relative to *E. chaffeensis*-infected and TRP120-Hh-SLiM  
311 treated cells in the presence of α-TRP32 antibody (**Fig. 9A-B**). These data confirm that  
312 the TRP120 Hh SLiM activates GLI-1 and the interaction can be blocked by antibody.

313

#### 314 ***E. chaffeensis* TRP120 Hh SLiM upregulates BCL-2 expression.**

315 During gene expression analysis of the Hh signaling pathway, we observed a significant  
316 increase in *BCL2* gene transcription. *BCL2* is one of the major transcriptional targets of  
317 the Hh signaling pathway (24). BCL-2 is involved in maintaining mitochondrial  
318 membrane integrity and preventing activation of caspases by inhibiting cytochrome-c  
319 release from mitochondria, thus inhibiting intrinsic apoptotic pathway (45). Hence, we  
320 hypothesized that *E. chaffeensis* activates Hh to upregulate BCL2 to engage an anti-  
321 apoptotic cellular program. *E. chaffeensis*-infected (**Fig. 10A**), TRP120-Hh-SLiM- or  
322 TRP120-Hh-SLiM-mut-treated (**Fig. 10B**) THP-1 cells were collected for immunoblot to  
323 determine BCL-2 levels. Significant upregulation of BCL-2 was detected in *E.*  
324 *chaffeensis*-infected and TRP120-Hh-SLiM-treated cells compared to negative controls.  
325 Further, we examined the effect of BCL-2 inhibition on *E. chaffeensis* infection using  
326 siRNA to individually target and silence *BCL-2* in THP-1 cells. At 24 hpi of *BCL-2*  
327 siRNA-transfected cells, *E. chaffeensis* infection (depicted by *dsb* levels) was  
328 significantly reduced (**Fig. 10C**). Collectively, these data suggest that *E. chaffeensis*



329 utilizes its TRP120 Hh SLiM to activate the Hh signaling pathway and upregulate BCL-2  
330 for intracellular survival.

331

332 ***E. chaffeensis* mediated activation of Hh signaling inhibits host cell apoptosis.**

333 It is well documented that Hedgehog signaling promotes cell proliferation and prevents  
334 cell apoptosis through BCL-2 activation (23, 24, 43). BCL-2 is involved in the inhibition  
335 of mitochondria-mediated pro-death pathway (46). Based on our results demonstrating  
336 the importance of BCL-2 in *E. chaffeensis* infection, we hypothesized that *E. chaffeensis*  
337 activates Hh signaling to inhibit mitochondria-mediated host cell apoptosis via activation  
338 of Hh signaling. To examine this hypothesis, infected and uninfected THP-1 cells were  
339 treated with Etoposide, an inhibitor of topoisomerase II and inducer of cellular  
340 apoptosis, and stained with the JC-1 dye (**Fig. 11A**). *E. ch.*-infected Etoposide-treated  
341 THP-1 cells exhibited a significant increase in cells with JC-1 aggregates, suggesting  
342 active inhibition of host cell apoptosis during *E. chaffeensis* infection compared to  
343 uninfected Etoposide-treated cells. Additionally, there were significantly fewer apoptotic  
344 cells in DMSO and Etoposide + *E. chaffeensis* groups, but significantly more apoptotic  
345 cells in Etoposide groups, suggesting that *E. chaffeensis* inhibits apoptosis in the  
346 presence of Etoposide (**Fig. 11B**). We further confirmed the loss of mitochondrial  
347 membrane potential in the presence of SMO-specific inhibitor Vismodegib in *E.*  
348 *chaffeensis*-infected cells using JC-1 dye. The micrograph shows the presence of  
349 mitochondria with positive membrane potential in DMSO-treated cells infected with *E.*  
350 *chaffeensis* compared to Vismodegib-treated cells infected with *E. chaffeensis* (**Fig.**  
351 **11C**). Additionally, we treated cells with Vismodegib or DMSO and examined cellular

352 apoptotic state using the Nucview488 and the Mitoview 633 apoptosis assay. During *E.*  
353 *chaffeensis* infection and in the presence of Vismodegib, the Nucview488 dye (a  
354 substrate of active caspase 3) translocated to the nucleus, producing green  
355 fluorescence in infected cells compared to uninfected cells in the presence of  
356 Vismodegib. We did not observe any measurable difference in DMSO-treated  
357 uninfected and infected cells (**Fig. 11D**). These results demonstrate that Hh signaling  
358 plays a crucial role during *E. chaffeensis* infection in monocytes by inhibiting an intrinsic  
359 death signal.

360

361 ***E. chaffeensis* induces an apoptotic profile in the presence of Hh inhibitor.**

362 Our results demonstrate the importance of anti-apoptotic protein BCL-2 during *E.*  
363 *chaffeensis* infection. Additionally, we reveal the vital role that Hh signaling plays during  
364 *E. chaffeensis* infection to inhibit apoptosis. Based on our data demonstrating increased  
365 Nucview 488 dye in the nucleus of *E. chaffeensis* infected cells in the presence of  
366 Vismodegib, we hypothesized that *E. chaffeensis* activates Hedgehog signaling, thus  
367 activating BCL-2 to inhibit caspases 9 and 3. To confirm our hypothesis, *E. chaffeensis*-  
368 infected and uninfected THP-1 cells were treated with Vismodegib or DMSO (**Fig. 12A**).  
369 *E. chaffeensis*-infected Vismodegib-treated THP1 cells demonstrated a significant  
370 increase in cytoplasmic condensation (precursor to apoptosis) at 24 hpi compared to  
371 uninfected Vismodegib-treated cells and *E. chaffeensis*-infected and uninfected DMSO-  
372 treated cells, supporting the conclusion that *E. chaffeensis* activates Hh signaling to  
373 prevent apoptosis. Additionally, ehrlichial survival was significantly reduced in the  
374 presence of Vismodegib compared to DMSO (**Fig. 12B**). Further, cell viability

375 significantly decreased in *E. chaffeensis*-infected cells treated with Vismodegib (**Fig.**  
376 **11B**). To define a direct mechanism by which *E. chaffeensis* activates Hedgehog  
377 signaling to prevent apoptosis, we evaluated levels of BCL-2, caspase 9 and caspase 3  
378 (**Fig. 12D-F**). *E. chaffeensis*-infected Vismodegib-treated THP-1 cells showed a  
379 significant decrease in BCL-2 at 24 hpi compared to infected DMSO-treated cells (**Fig.**  
380 **12D**). In addition, *E. chaffeensis*-infected Vismodegib-treated THP1 cells show a  
381 significant decrease in pro-caspases 3 and 9 and a significant increase in cleaved-  
382 caspases 3 and 9 at 24 hpi compared to infected DMSO-treated cells (**Fig. 12E-F**).  
383 Collectively, these results define a direct mechanism by which *E. chaffeensis* targets Hh  
384 signaling to induce BCL-2 expression, thus preventing intrinsic apoptosis.

385

## 386 **Discussion**

387 The Hh pathway was first identified in *Drosophila* in the 1970s and for the last couple of  
388 decades, mostly studied in the field of developmental biology (47). More recent  
389 investigations have shown Hh role in cell proliferation, differentiation, and inhibition of  
390 apoptosis and unregulated activation of Hh signaling results in different hematological  
391 malignancies and other cancerous conditions (21, 23, 48, 49). The Hh pathway is  
392 targeted by multiple pathogens (18, 19); however, the specific mechanism by which  
393 pathogens target Hh signaling through SLiMs has not been reported. In this study, we  
394 identified a Hh SLiM within the *E. chaffeensis* TRP120 effector that activates the Hh  
395 signaling pathway and inhibits intrinsic host-cell apoptosis to enable infection of the  
396 monocyte. This is the first report of a eukaryotic Hh SLiM mimetic in bacterial  
397 proteomes, which represents a novel virulence strategy by obligate intracellular bacteria

398 and extends knowledge regarding eukaryotic cellular signaling motifs that are relevant  
399 in pathogen-host interplay. This investigation and other recent reports from our  
400 laboratory have provided compelling detail of the molecular mechanisms that *E.*  
401 *chaffeensis* uses to reprogram the host cell using SLiM mimicry. We have identified an  
402 array of eukaryotic ligand SLiMs positioned in a single surface expressed effector  
403 protein that interface with the host cell and activate Notch, Wnt and now Hh signaling to  
404 counter innate defense mechanism and promote infection (7, 9). Collectively, these  
405 studies provide the molecular basis of eukaryotic pathway activation by an intracellular  
406 pathogen and provides a model that is valuable for understanding how pathogens  
407 interface with eukaryotic cells and rewire host cell pathways for infection.

408

409 The Hh pathway has been implicated in various human diseases including several types  
410 of cancers (21, 23, 40). Notably, several recent studies have reported increased levels  
411 of Hh signaling in response to various pathogens (19, 50-52). An elevated level of Hh  
412 signaling was reported in cells infected with Hepatitis B and C virus (HBV and HCV,  
413 respectively), and hepatocytes from patients with chronic HBV and HCV infection  
414 displayed an increased production of Hh ligands and an accumulation of Hh-responsive  
415 cells with higher levels of pathway activity (50). Additionally, studies demonstrate that  
416 the *in vitro* treatment of hepatocytes with whole HBV replicon increases expression of  
417 Hh target genes in a GLI-dependent manner and viral protein HBV X stabilizes GLI-1  
418 and promotes its nuclear accumulation (52). Although a precise mechanism by which  
419 Hh signaling promotes HBV and HCV infections remains unclear, Hh activation in  
420 hepatocytes appears to promote HCV infection, indicating the presence of a positive

421 feedback loop between pathway activation and virus production (53). In addition,  
422 *Mycobacterium* species appear to mediate Hh signaling. *M. bovis* upregulates Shh-  
423 PI3K-mTOR-NF- $\kappa$ B signaling in human dendritic cells to activate BCG-induced Treg  
424 expansion. Interestingly, *M. bovis* relies heavily on Hh signaling, while Notch signaling  
425 hindered the ability of the infected dendritic cells to expand Tregs and Wnt signaling  
426 demonstrated no affect (51).

427  
428 *Ehrlichia chaffeensis* TRP120 is a moonlighting protein involved in modulating various  
429 cellular processes (54) and has evolved Wnt and Notch SLiMs to activate the conserved  
430 cellular signaling pathways (7, 9). In a recent report demonstrating Notch activation  
431 during *E. chaffeensis* infection, we determined *GLI-1* gene expression was activated by  
432 a Notch ligand SLiM in the TRP120 TR (4). The intricate crosstalk between Wnt, Notch,  
433 and Hh signaling is well defined; thus, we investigated the possibility of additional ligand  
434 SLiMs and Hh pathway activation during *E. chaffeensis* infection (35). Utilizing similar *in*  
435 *silico* analysis, a potential TRP120 Hh SLiM was predicted within the TRP120 TRD with  
436 significant homology to a region of Hh ligands at the Hh ligand-PTCH receptor binding  
437 site (37). Using iRNA, we demonstrated that *E. chaffeensis* relies on PTCH2, but not  
438 PTCH1 for survival. Although PTCH1 and PTCH2 share overlapping functions (55),  
439 PTCH1 contains an ubiquitin ligase binding site within its C-terminal tail, making it less  
440 stable than PTCH2, which may make PTCH1 less favorable to TRP120 (56). We  
441 determined that TRP120 TRD interacts directly and has strong binding affinity (nM  
442 range) with PTCH2. Moreover, multiple studies have investigated the affinity of Hh  
443 ligands to PTCH receptors and reported ligand affinity for PTCH1 (Shh, 1.0 nM; Dhh,

444 2.6 nM; Ihh, 1.0 nM) and PTCH2 (Shh, 1.8 nM; Dhh, 0.6 nM; Ihh, 0.4 nM) (57).  
445 Interestingly, Shh binds PTCH2 with stronger affinity, while Dhh and Ihh bind PTCH1  
446 with stronger affinity. TRP120 may bind PTCH2 similarly to Shh in our model, since Shh  
447 is highly expressed in THP-1 cells compared to Dhh and Ihh and has a greater affinity to  
448 PTCH2. Further, the affinity of endogenous Hh ligands for PTCH2 is strong, but  
449 surprisingly weaker than what was exhibited by TRP120 ( $4.40 \pm 1.5$  nM). A recent study  
450 demonstrates that ligands with higher binding affinity disable lower affinity ligands from  
451 binding their receptor (58). Thus, TRP120 may have a higher binding affinity to PTCH2  
452 to provide a competitive advantage over endogenous Hh ligands.

453

454 We investigated whether TRP120 is directly responsible for activating Hh signaling  
455 during infection. Indeed, we confirmed that TRP120 induces nuclear translocation of  
456 GLI-1 and transcriptional induction of Hh pathway genes including crucial components  
457 of the Hh-signaling pathway such as PTCH2, SMO, and GLI-1. Although there was  
458 differential expression of Hh pathway genes in TRP120 treated and Shh ligand treated  
459 THP-1 cells, we discovered that more than 50% of genes were common during TRP120  
460 and Shh treatment, which supports TRP120 as a Hh ligand mimic. Differences between  
461 TRP120 and Shh are expected, since there are differing biological functions between  
462 Shh, Dhh and Ihh ligands despite a highly similar amino acid sequence (59).

463 Additionally, TRP120 also contains Wnt and Notch SLIMs which may influence gene  
464 expression due to the intricate crosstalk between the pathways. For example, Notch  
465 signaling directly regulates effector and target molecules of the Hedgehog signaling  
466 pathway (60). Additionally, Wnt signaling increases GLI-1 transcriptional activity (61),

467 which suggests that TRP120 can regulate Hh signaling in various ways. In addition, we  
468 concluded that the predicted TRP120 Hh SLiM peptide is sufficient in activating Hh  
469 signaling. Here, we established a model of eukaryotic protein mimicry where the  
470 TRP120 Hh SLiM is functional and activates the Hh signaling pathway and Hh gene  
471 targets in a concentration dependent manner. In our experiments, the TRP120 Hh SLiM  
472 demonstrated stronger upregulation of Hh gene targets than full length TRP120. This is  
473 likely related to the molar concentration of SLiM sequences present in each treatment.  
474 The actual amount of SLiM added using rTRP120 is substantially less than the  
475 concentration of peptide SLiM used. Nevertheless, there were similar and consistent Hh  
476 gene activation profiles observed with *E. chaffeensis*, TRP120 and TRP120 Hh SLiM.  
477 The TRP120 Hh SLiM has sequence homology with the N-terminal region of Shh, which  
478 is responsible for binding PTCH receptors (62). However, the amino acid residues  
479 important for Shh-PTCH2 interactions have not been well defined. Our findings  
480 demonstrate that mutations in the homology sequence between TRP120 and Hh  
481 ligands results in deactivation of Hh signaling, which indicates that these amino acid  
482 residues may be critical in Hh ligand-PTCH2 binding and subsequent GLI-1 activation.  
483 To further support our results, we used an antibody that would recognize and block the  
484 TRP120 Hh SLiM. Indeed, we determined that antibody binding and blocking of the Hh  
485 SLiM inhibits both *E. chaffeensis* and TRP120 Hh SLiM activation of Hh signaling.  
486 These experiments also demonstrate that the TRP120 Hh SLiM is the only Hh mimetic  
487 utilized by *E. chaffeensis*, since the antibody blocked GLI-1 activation in SLiM treated  
488 and *E. chaffeensis* infected groups.  
489

490 In the past year, our laboratory has demonstrated that TRP120 contains multiple SLiMs  
491 that activate Hh, Notch and Wnt signaling, which likely work together to promote  
492 infection due to the well-known but complex crosstalk between Hh, Notch and Wnt  
493 pathways (60). Each TRP120 SLiM is found within the intrinsically disordered TRD  
494 within close proximity, suggesting that the TRD has a primary and potentially unique role  
495 in SLiM mimicry (7, 9). TRDs are often identified in bacterial proteins with critical  
496 functions for pathogenicity (63). For example, *Xanthomonas* secreted TAL effectors  
497 contain repeats, which facilitate DNA binding and gene regulation (64, 65). Similarly, we  
498 have identified DNA binding capability in the TR domain of TRP120 (11). SLiMs drive  
499 evolution and rapidly evolve *ex nihilo* to add new functionality to proteins. Pathogens  
500 are known to convergently evolve SLiMs within disordered regions due to the limited  
501 number of mutations necessary for the generation of a new SLiM (66). SLiMs contain  
502 high evolutionary plasticity due to their disordered nature, short length and limited  
503 number of specificity-determining residues (67). Thus, it appears that *E. chaffeensis* has  
504 evolved TRP120 SLiMs through convergent evolution to increase complexity necessary  
505 for engaging multiple cellular signaling pathways. All presently defined SLiMs acquired  
506 by TRP120 activate conserved signaling pathways known to prevent apoptosis, which  
507 may be a strategy utilized by *E. chaffeensis* to assure host-cell survival for the *Ehrlichia*  
508 life cycle.

509

510 During microbial infection, cellular apoptosis plays an important role as a host defense  
511 mechanism, as it minimizes infection and contributes to protective immunity through  
512 processing apoptotic bodies containing infected microbes to facilitate antigen



513 presentation (29). Intracellular bacteria usually require several days of replication in a  
514 host cell before being released to infect neighboring cells. Thus, pathogens like  
515 *Mycobacterium*, *Chlamydia*, *Rickettsia*, *Anaplasma*, and others have evolved multiple  
516 mechanisms to inhibit host cell apoptosis (68-72). Intracellular pathogens regulate host  
517 cell apoptosis to modulate the host immune defenses in a variety of ways, including  
518 regulation of the mitochondria-mediated intrinsic apoptosis pathway (28, 29, 73). For  
519 instance, *E. chaffeensis* utilizes the Type IV secretion system (T4SS) effector Etf-1 to  
520 enter the mitochondria and inhibit mitochondria-mediated intrinsic apoptosis in host cells  
521 (74). T4SS effectors are well known for their virulence role in preventing apoptosis  
522 during infection (75). However, there are many mechanisms pathogens exploit to inhibit  
523 apoptosis. Notably, in this study we demonstrate a novel mechanism associated with a  
524 T1SS effector capable of inhibiting apoptosis. We reveal that TRP120 significantly  
525 increases BCL2 expression via its Hh SLiM, thus preventing host intrinsic apoptosis  
526 signaling which promotes ehrlichial infection. Additionally, siRNAs against *BCL-2*  
527 significantly reduced ehrlichial load, suggesting that Hh regulated BCL-2 anti-apoptotic  
528 mechanisms are an important component of an anti-apoptotic strategy by *Ehrlichia*.  
529 Notably, *in vitro* studies demonstrate the upregulation of BCL-2 and in host  
530 macrophages during *Mycobacterium tuberculosis* infection to prevent apoptosis for  
531 intracellular survival (76). Additionally, *Mycobacterium tuberculosis* secretes PtpA to  
532 dephosphorylate host protein GSK3 and suppresses caspase 3 during early infection to  
533 prevent host-cell apoptosis (77). Interestingly, GSK3 is well known for its role during Hh  
534 signaling by regulating GLI (78).  
535

536 Hh signaling plays a critical role in promoting differentiation, proliferation and  
537 maturation, and preventing apoptosis of different immune cells, including monocytes  
538 and macrophages (79, 80). A small molecule Hh inhibitor of the cell surface receptor  
539 SMO (Vismodegib) confirmed that the Hh pathway inhibits apoptosis and is required for  
540 ehrlichial survival. We confirmed that loss of Hh signaling during ehrlichial infection  
541 induces the intrinsic apoptotic pathway. Specifically, we conclude that *E. chaffeensis*  
542 activates BCL-2 to prevent intrinsic apoptosis by maintaining the integrity of the  
543 mitochondrial membrane, preventing the release of cytochrome c, and activation of  
544 caspase 9 and caspase 3. These results reveal a novel mechanism by which *E.*  
545 *chaffeensis* modulates the Hh pathway for infection by extending the host cell lifespan,  
546 which is consistent with the role of this pathway in cell biology.

547  
548 Diving deeper into understanding the molecular mechanisms of *E. chaffeensis*  
549 pathogenesis in modulating complex cellular processes will help in developing next-  
550 generation therapeutics, specifically aimed at mechanistically defined host targets. The  
551 current study reveals a novel mechanism where *E. chaffeensis* utilizes SLiM ligand  
552 mimicry to activate Hh signaling in the host, thus modulating the intrinsic apoptotic  
553 signal as depicted in **Fig. 13**. Hence, this study reveals the importance of the Hh  
554 signaling pathway in ehrlichial intracellular growth and developmental cycle and  
555 provides a new target for the development of a novel therapeutic approach against  
556 ehrlichial infection that may be applicable to other intracellular pathogens, in which  
557 exploitation of such conserved cellular pathways is necessary for infection.

558

559 **Materials and Methods**

560

561 **Cell culture and *E. chaffeensis* cultivation.**

562 Human monocytic leukemia cells (THP-1; ATCC TIB-202) or primary human monocytes  
563 (PHMs) were propagated in RPMI 1640 with L-glutamine and 25 mM HEPES buffer  
564 (Invitrogen, Carlsbad, CA), supplemented with 1 mM sodium pyruvate (Sigma-Aldrich,  
565 St. Louis, MO), 2.5 g/liter D-(+)-glucose (Sigma-Aldrich), and 10% fetal bovine serum at  
566 37°C in a 5% CO<sub>2</sub> atmosphere. Human primary monocytes were isolated using MACS  
567 negative selection (Miltenyi Biotec, Cambridge, MA) from peripheral blood mononuclear  
568 cells obtained from healthy human donors (de-identified) (Gulf Coast Regional Blood  
569 Center, Houston, TX). *Ehrlichia chaffeensis* (Arkansas strain) was cultivated in THP-1  
570 cells as previously described (81). Cells were harvested with 30% confluency for  
571 confocal microscopy and 100% confluency for all other experiments.

572

573 **Protein sequence analysis.**

574 The TRP120 protein sequence (NCBI gene accession number AAO12927.1) and  
575 Dhh/Ihh/Shh *Homo sapiens* protein sequences (NCBI gene accession numbers  
576 NP\_066382/ NP\_002172/ NP\_000184.1) were analyzed by the NCBI Protein Basic  
577 Local Alignment Search Tool (Protein BLAST) for sequence alignment.

578 **Informational spectrum method analysis.**

579 Informational spectrum method (ISM) *in-silico* analysis was performed by the Biomed  
580 Protection (biomedprotection.com) using a WEB platform and described in detail  
581 previously (7).

582

583 **Recombinant proteins and peptides.**

584 *E. chaffeensis* recombinant full length TRP120 (rTRP120-FL), TRP120 TRD (rTRP120-  
585 TR) or thioredoxin (rTrx; ctrl) were expressed in *E. coli* and purified as described  
586 previously (4). rTRP120 is a Trx-fusion protein; therefore, rTrx was used as a negative  
587 control. rShh (R&D Systems, Minneapolis, MN) and rPTCH2 (MyBioSource, San Diego,  
588 CA) were obtained from a commercial source. Shh was selected as a positive control  
589 since it is normally expressed in THP-1 cells, while Dhh and Ihh are not (The Human  
590 Protein Atlas; [www.proteinatlas.org](http://www.proteinatlas.org)). Peptides were commercially synthesized  
591 (GenScript, Piscataway, NJ) for TRP120-TR-Hh (VSKVEQEKTNPVLIKDLQD;  
592 contains the homologous Hh sequence), TRP120-TR (-)  
593 (SHQGETEKESGITESHQKEDEI; neg ctrl) , TRP120-Hh-SLiM (NPEVLIKD), and  
594 TRP120-Hh-SLiM-mut (SKVEQEKTGAGAGAGALQ; Gln/Ala substitutions in the Hh  
595 SLiM motif).

596

597 **Antibodies and inhibitors.**

598 Antibodies used in this study include  $\alpha$ -DSB (82),  $\alpha$ -TRP120-I1 (targets TRP120  
599 sequence SKVEQEETNPEVLIKDLQDVAS) (83),  $\alpha$ -TRP32 (84),  $\alpha$  -GLI-1/2/3 (Santa  
600 Cruz Biotechnology, Dallas, TX),  $\alpha$ -SHH (Cell Signaling, Danvers, MA),  $\alpha$ -SUFU (Cell

601 Signaling),  $\alpha$ -PTCH1/2 (Cell Signaling),  $\alpha$ -SMO (Sigma-Aldrich),  $\alpha$ -BCL-2 (Cell  
602 Signaling),  $\alpha$ -Caspase 3 (Cell Signaling),  $\alpha$ -Caspase 9 (Cell Signaling),  $\alpha$ -GAPDH  
603 (MilliporeSigma, Burlington, MA) and  $\alpha$ -PCNA (Cell Signaling). Inhibition of the Hh-  
604 signaling pathway was performed using Vismodegib/GDC0499 (Selleckchem, Houston,  
605 TX).

606

### 607 **RNA interference.**

608 THP-1 cells ( $1.0 \times 10^6$ ) were transfected with human siRNA (10 nM) using  
609 Lipofectamine 3000 (Invitrogen, Waltham, MA). All siRNAs were ON-TARGETplus  
610 SMARTpool (Dharmacon, Lafayette, Co). Briefly, specific siRNA (3  $\mu$ l) and  
611 Lipofectamine 3000 reagent (7.5  $\mu$ l) were added to the Opti-MEM medium (250  $\mu$ l)  
612 (Invitrogen), incubated for 5 min at room temperature, and then added to the cell  
613 suspension in a 6-well plate. Scrambled siRNA was used as a control in uninfected and  
614 infected samples. Post-transfection (24 h), cells were infected with cell-free *E.*  
615 *chaffeensis* (MOI 100). Cells were harvested at 24 hpi to and ehrlichial load determined  
616 using qPCR as described previously (85). All knockdowns were performed with three  
617 biological and technical replicates and significance determined using a *t*-test analysis.

618

### 619 **Transfection and immunofluorescent microscopy.**

620 HeLa cells were transfected with plasmid using Lipofectamine 2000 (Invitrogen)  
621 according to the manufacturer's protocol. Cells ectopically expressing TRP120 were  
622 imaged by immunofluorescent microscopy as described previously (86). Intensity

623 correlation analysis (ICA) and corrected total cell florescence (CTCF) were measured  
624 using ImageJ (87, 88).

625

### 626 **Co-Immunoprecipitation (Co-IP).**

627 Interactions between TRP120 and PTCH2 were determined by Co-IP using the Thermo  
628 Scientific Pierce Crosslink IP Kit (#26147). THP-1 cells (100% confluent) were infected  
629 with *E. chaffeensis* at an MOI of 100 for 24 h. The cells were harvested, and Co-IPs  
630 were performed with TRP120-I1 and PTCH2 antibodies according to the manufacturer's  
631 protocol. Immunoprecipitated eluates and starting input lysates were processed for  
632 Western blotting and probed for TRP120 or PTCH2. IP control antibody included IgG  
633 purified from normal rabbit serum with Melon Gel IgG Spin Purification Kit (Thermo  
634 Scientific, Rockford, IL). The Co-IPs performed in triplicate.

635

### 636 **Surface plasmon resonance (SPR).**

637 SPR was used to investigate binding kinetics of rTRP120 tandem repeat domain  
638 (TRP120-TR) and rPTCH2 and performed as described previously (7). Briefly, SMFS-  
639 AFM was used to directly extract energetic, thermodynamic and kinetic parameters from  
640 force curves describing the TRP120-PTCH2 receptor binding free-energy landscape.  
641 rPTCH2 was immobilized on a nickel chip followed by the injection of an analyte  
642 solution containing solubilized rTRP120-TR or rTrx (-) to determine the binding affinity  
643 on a Biacore T100. Constant injection of rTRP120-TR provided a quantified  
644 readout derived from the change in mass on the surface of the chip as rTRP120-TR  
645 binds rPTCH2 at a constant rate until reaching equilibrium. The unbinding forces were

646 plotted as a function of the loading rate; from this plot we extracted the dissociation rate  
647 ( $k_{off}$ ) and the energy barrier width  $x_u$  (nm). The kinetic on-rate,  $k_{on}$ , was obtained by  
648 varying the dwell time of the TRP120-functionalized tip on cell surfaces, thereby  
649 determining binding probability. Using these parameters, we quantified the  $\Delta G$  of  
650 interaction. The results were expressed as the means  $\pm$  standard deviation (SD) of data  
651 obtained from three independent experiments. rTrx fusion protein was used as the  
652 negative control since it has no effect on Hh signaling. The binding affinity ( $K_D$ ) was  
653 determined for TRP120-PTCH2 interaction by extracting the association rate constant  
654 and dissociation rate constant from the sensorgram curve ( $K_D = k_d/k_a$ ).

655

#### 656 **Confocal microscopy.**

657 *Ehrlichia chaffeensis*-infected and uninfected THP-1 cells were seeded in T-75 flasks  
658 (Corning, Lowell, MA) and collected at 0, 2, 4, 10, 24 and 48 hpi. rTRP120-FL, rTrx,  
659 rShh, TRP120-TR-Hh, TRP120-TR (-), TRP120-Hh-SLiM and TRP120-Hh-SLiM-mut  
660 peptide-stimulated THP-1 cells were collected at 6 hpt. Experiments performed with at  
661 least three biological and technical replicates. THP-1 samples (non-adherent) were  
662 washed twice and adhered to glass slides by cyto centrifugation (1000 RPM for 5 min).  
663 Uninfected, *E. chaffeensis*-infected, rTRP120-FL-, rTrx-, rShh-, and TRP120-Hh-SLiM  
664 and TRP120-Hh-SLiM-mut peptide-treated PHMs were seeded in 12-well plates  
665 (Corning, Lowell, MA) containing a coverslip and incubated for 10 h. After incubation,  
666 PHMs were washed twice with phosphate buffered saline (PBS). THP-1 cells and PHMs  
667 were fixed with 4% paraformaldehyde (PFA) for 20 min at room temperature followed by  
668 three subsequent washes in PBS. Fixed cells were blocked and permeabilized with

669 0.3% Triton X-100 in 2% BSA for 30 min and washed. The cells were then incubated  
670 subsequently with a mouse monoclonal GLI-1 primary antibody (1:200) and in-house  
671 rabbit DSB serum in blocking buffer (PBS with 2% BSA) for 1 h, with PBS washes (3X)  
672 after each treatment. Cells were incubated with Alexa Fluor-conjugated secondary  
673 antibodies goat  $\alpha$ -mouse and goat  $\alpha$ -rabbit (Thermo Fisher) diluted 1:200 in blocking  
674 buffer for 30 min and mounted with ProLong Gold Antifade with DAPI (4',6-diamidino-2-  
675 phenylindole; Thermo Fisher). Confocal laser micrographs were obtained with Zeiss  
676 LSM 880 laser microscope and analyzed with Zen black and Fiji software. For confocal  
677 analysis, randomized areas/slide (n=10) were used to detect GLI-1 nuclear  
678 translocation.

679

#### 680 **RNA isolation and cDNA synthesis.**

681 Uninfected, *E. chaffeensis*-infected, rTRP120-FL, rShh, TRP120-Hh-SLiM peptide and  
682 TRP120-Hh-SLiM-mut peptide-stimulated THP-1 cells were harvested at different time  
683 points and data was generated from three biological and technical replicates. *E.*  
684 *chaffeensis* infection was collected at 4, 8, 24 and 48 hpi at MOI 100. THP-1 cells were  
685 incubated with 50, 500 ng/mL or 1  $\mu$ g/mL of peptide or recombinant protein and  
686 harvested at 24 hpt. rTrx (-) or uninfected/untreated cells were used as controls for  
687 infection, and protein and peptide treatments to determine fold-change. Total RNA was  
688 isolated from each sample ( $10^6$  cells/sample) using RNeasy Mini kit (Qiagen, Hilden,  
689 Germany). On column DNA digestion was performed using the RNase-free DNase kit  
690 (Qiagen). The concentration and the purity of RNA were determined using a Nanodrop  
691 100 spectrophotometer (Thermo Fisher Scientific). cDNA was synthesized from total



692 RNA (1.0 µg) using iScript cDNA Synthesis Kit (BioRad, Hercules, CA) according to the  
693 manufacturer's protocol.

694

#### 695 **Human Hh signaling pathway PCR array.**

696 The human Hh signaling target PCR array (Qiagen) profiled the expression of 84 key  
697 genes responsive to Hh signal transduction, that includes receptors, ligands, and  
698 transcription factor/co-factors, and known target genes. PCR arrays were performed  
699 according to the PCR array handbook from the manufacturer (Qiagen). Real-time PCR  
700 was performed using RT<sup>2</sup> Profiler PCR array in combination with RT<sup>2</sup> SYBR green  
701 master mix (Qiagen) using a QuantStudio 6 Flex real-time PCR system. PCR conditions  
702 and analysis were conducted as previously described (7). The red, black and green dots  
703 in the volcano plot represent upregulation ( $\geq 2$ ), no change or down-regulation ( $\leq -2$ ),  
704 respectively for a given gene on the array. The horizontal blue lines on the volcano plots  
705 determine the level of significance ( $p \leq 0.05$ ).

706

#### 707 **Western immunoblot analysis.**

708 For Western blots, THP-1 cells were harvested and washed twice with PBS and lysates  
709 were prepared using CytoBuster protein extraction reagent (Novagen/EMD, Gibbstown,  
710 NJ) supplemented with complete mini EDTA-free protease inhibitor (Roche, Basel,  
711 Switzerland), phenylmethane-sulfonylfluoride PMSF (10 mM) (Sigma-Aldrich). The cell  
712 lysates were centrifuged at 15,000g for 10 min at 4°C. The supernatants were collected,  
713 and protein concentration was then measured using Pierce BCA Protein Assay Kit  
714 (Thermo Fisher Scientific, Waltham, MA). Equal amounts of protein (15-30 µg/well)

715 were separated by sodium dodecyl sulfate-polyacrylamide gel electrophoresis (SDS-  
716 PAGE), transferred to nitrocellulose membrane and immunoblotted with primary  
717 antibodies. Horseradish peroxidase-conjugated goat anti-rabbit or goat anti-mouse IgG  
718 (H+L) secondary antibodies (Kirkegaard & Perry Laboratories, Gaithersburg, MD) were  
719 used and visualized by SuperSignal West Dura chemiluminescent substrate or ECL  
720 (Thermo Fisher Scientific). All Western blots were performed with at least three  
721 biological and technical replicates and significance determined by *t*-test analysis.

722

### 723 **Mitochondrial membrane potential assay.**

724 To confirm *E. chaffeensis*-mediated inhibition of host cell apoptosis, infected and  
725 uninfected THP-1 cells were treated with DMSO (- control) or Etoposide (100  $\mu$ m)  
726 (Selleckchem), an inhibitor of topoisomerase II and inducer of cellular apoptosis, for 24  
727 h and stained with a JC-1 Mitochondrial Membrane Potential Detection Kit using the  
728 manufacturers protocol (Biotium, Fremont, CA). The dye forms JC aggregates (orange;  
729  $590\pm 17.5$ nm) in mitochondria with positive membrane potential in normal cells.  
730 Inversely, due to depolarization of the mitochondrial membrane in apoptotic cells, JC-1  
731 remains as a monomer and yields green fluorescence (emission of  $530\pm 15$ nm). To  
732 inhibit Hh signaling, THP-1 cells were treated with a SMO-specific inhibitor Vismodegib  
733 (200 nM) for 24 h. NucView® 488 & MitoView™ 633 Apoptosis Assay Kit was utilized to  
734 examine cellular apoptotic state using the manufacturers protocol (Biotium). A  
735 micrograph was used to demonstrate that the Nucview488 dye (a substrate of active  
736 caspase 3) is cleaved by caspase 3/7 and produces green fluorescence due to the

737 activation of the cellular apoptotic pathway. Experiments were performed with at least  
738 three biological and technical replicates.

739

740 **Hh inhibitor infection analysis.**

741 THP-1 cells were treated with Vismodegib or DMSO (200 nM) and infected with *E.*  
742 *chaffeensis* (MOI 50) for 24 h. THP-1 cells were harvested for Western blot (as  
743 described) and Diff-Quik staining (Fisher Scientific). Ehrlichial load was determined  
744 using qPCR as described previously (85). Cell viability and count were measured with  
745 the Cellometer mini (Nexcelom) with preinstalled normal and *E. chaffeensis*-infected  
746 THP-1 cell profiles. Cellometer Mini uses bright field imaging and pattern-recognition  
747 software to count and define individual live cells and dead cells stained with Trypan  
748 Blue. An analysis summary is produced, including a Trypan blue cell count,  
749 concentration, diameter, and % viability. At least three biological and technical  
750 replicates were performed.

## **Acknowledgments**

We thank the UTMB Solution Biophysics Laboratory and the Optical Microscopy Core for assistance with confocal microscopy. This work was supported by the National Institute of Allergy and Infectious Disease grants AI137779 and AI149136 to J.W.M., McLaughlin Endowment and T32AI007526-20 Biodefense Training Program predoctoral fellowships to C.D.B., NIH 1F31AI152424 predoctoral fellowship to L.L.P, and Sealy Center for Vector Borne and Zoonotic Diseases predoctoral fellowship to N.A.P.

## References

1. Zhang JZ, Popov VL, Gao S, Walker DH, Yu XJ. The developmental cycle of *Ehrlichia chaffeensis* in vertebrate cells. *Cell Microbiol.* 2007;9(3):610-8.
2. Lina TT, Farris T, Luo T, Mitra S, Zhu B, McBride JW. Hacker within! *Ehrlichia chaffeensis* Effector Driven Phagocyte Reprogramming Strategy. *Frontiers in cellular and infection microbiology.* 2016;6.
3. Luo T, Kuriakose JA, Zhu B, Wakeel A, McBride JW. *Ehrlichia chaffeensis* TRP120 interacts with a diverse array of eukaryotic proteins involved in transcription, signaling, and cytoskeleton organization. *Infect Immun.* 2011;79(11):4382-91.
4. Lina TT, Dunphy PS, Luo T, McBride JW. *Ehrlichia chaffeensis* TRP120 Activates Canonical Notch Signaling To Downregulate TLR2/4 Expression and Promote Intracellular Survival. *mBio.* 2016;7(4).
5. Dunphy PS, Luo T, McBride JW. *Ehrlichia chaffeensis* Exploits Host SUMOylation Pathways to Mediate Effector-Host Interactions and Promote Intracellular Survival. *Infect Immun.* 2014.
6. Zhu B, Das S, Mitra S, Farris TR, McBride JW. *Ehrlichia chaffeensis* TRP120 moonlights as a HECT E3 ligase involved in self and host ubiquitination to influence protein interactions and stability for intracellular survival. *Infect Immun.* 2017.
7. Rogan MR, Patterson LL, Byerly CD, Luo T, Paessler S, Veljkovic V, et al. *Ehrlichia chaffeensis* TRP120 Is a Wnt Ligand Mimetic That Interacts with Wnt Receptors and Contains a Novel Repetitive Short Linear Motif That Activates Wnt Signaling. *mSphere.* 2021;6(2).
8. Wang JY, Zhu B, Patterson LL, Rogan MR, Kibler CE, McBride JW. *Ehrlichia chaffeensis* TRP120-mediated ubiquitination and proteasomal degradation of tumor suppressor FBW7 increases oncoprotein stability and promotes infection. *PLoS Pathog.* 2020;16(4):e1008541.
9. LaNisha L, Patterson TSV, Caitlan D, Byerly, Duc Cuong Bui, Jignesh Patel, Veljko Veljkovic, Slobodan Paessler, Jere W. McBride. *Ehrlichia* SLiM ligand mimetic activates Notch signaling in human monocytes. *bioRxiv.* 2022;01.13.476283.
10. Luo T, Dunphy PS, Lina TT, McBride JW. *Ehrlichia chaffeensis* Exploits Canonical and Noncanonical Host Wnt Signaling Pathways to Stimulate Phagocytosis and Promote Intracellular Survival. *Infect Immun.* 2015.
11. Zhu B, Kuriakose JA, Luo T, Ballesteros E, Gupta S, Fofanov Y, et al. *Ehrlichia chaffeensis* TRP120 binds a G+C-rich motif in host cell DNA and exhibits eukaryotic transcriptional activator function. *Infect Immun.* 2011;79(11):4370-81.
12. Zhu B, Das S, Mitra S, Farris TR, McBride JW. *Ehrlichia chaffeensis* TRP120 Moonlights as a HECT E3 Ligase Involved in Self- and Host Ubiquitination To Influence Protein Interactions and Stability for Intracellular Survival. *Infect Immun.* 2017;85(9).
13. Davey NE, Trave G, Gibson TJ. How viruses hijack cell regulation. *Trends Biochem Sci.* 2011;36(3):159-69.
14. Samano-Sanchez H, Gibson TJ. Mimicry of Short Linear Motifs by Bacterial Pathogens: A Drugging Opportunity. *Trends Biochem Sci.* 2020;45(6):526-44.
15. Armas-Lopez L, Zuniga J, Arrieta O, Avila-Moreno F. The Hedgehog-GLI pathway in embryonic development and cancer: implications for pulmonary oncology therapy. *Oncotarget.* 2017;8(36):60684-703.

16. Ingham PW, McMahon AP. Hedgehog signaling in animal development: paradigms and principles. *Genes & development*. 2001;15(23):3059-87.
17. Lee RT, Zhao Z, Ingham PW. Hedgehog signalling. *Development*. 2016;143(3):367-72.
18. Lan X, Wen H, Cheng K, Plagov A, Marashi Shoshtari SS, Malhotra A, et al. Hedgehog pathway plays a vital role in HIV-induced epithelial-mesenchymal transition of podocyte. *Experimental cell research*. 2017;352(2):193-201.
19. Smelkinson MG. The Hedgehog Signaling Pathway Emerges as a Pathogenic Target. *J Dev Biol*. 2017;5(4).
20. Taipale J, Cooper MK, Maiti T, Beachy PA. Patched acts catalytically to suppress the activity of Smoothened. *Nature*. 2002;418(6900):892-7.
21. Irvine DA, Copland M. Targeting hedgehog in hematologic malignancy. *Blood*. 2012;119(10):2196-204.
22. Yang L, Xie G, Fan Q, Xie J. Activation of the hedgehog-signaling pathway in human cancer and the clinical implications. *Oncogene*. 2010;29(4):469-81.
23. Jia Y, Wang Y, Xie J. The Hedgehog pathway: role in cell differentiation, polarity and proliferation. *Arch Toxicol*. 2015;89(2):179-91.
24. Han ME, Lee YS, Baek SY, Kim BS, Kim JB, Oh SO. Hedgehog signaling regulates the survival of gastric cancer cells by regulating the expression of Bcl-2. *Int J Mol Sci*. 2009;10(7):3033-43.
25. Behar SM, Briken V. Apoptosis inhibition by intracellular bacteria and its consequence on host immunity. *Curr Opin Immunol*. 2019;60:103-10.
26. Strasser A, O'Connor L, Dixit VM. Apoptosis signaling. *Annu Rev Biochem*. 2000;69:217-45.
27. Ashida H, Mimuro H, Ogawa M, Kobayashi T, Sanada T, Kim M, et al. Cell death and infection: a double-edged sword for host and pathogen survival. *The Journal of cell biology*. 2011;195(6):931-42.
28. Rudel T, Kepp O, Kozjak-Pavlovic V. Interactions between bacterial pathogens and mitochondrial cell death pathways. *Nature reviews Microbiology*. 2010;8(10):693-705.
29. Lamkanfi M, Dixit VM. Manipulation of host cell death pathways during microbial infections. *Cell host & microbe*. 2010;8(1):44-54.
30. Bigelow RL, Chari NS, Uden AB, Spurgers KB, Lee S, Roop DR, et al. Transcriptional regulation of bcl-2 mediated by the sonic hedgehog signaling pathway through gli-1. *J Biol Chem*. 2004;279(2):1197-205.
31. Murphy KM, Ranganathan V, Farnsworth ML, Kavallaris M, Lock RB. Bcl-2 inhibits Bax translocation from cytosol to mitochondria during drug-induced apoptosis of human tumor cells. *Cell Death Differ*. 2000;7(1):102-11.
32. Williams NM, Timoney PJ. In vitro killing of *Ehrlichia risticii* by activated and immune mouse peritoneal macrophages. *Infection & Immunity*. 1993;61(3):861-7.
33. Zhang JZ, Sinha M, Luxon BA, Yu XJ. Survival strategy of obligately intracellular *Ehrlichia chaffeensis*: novel modulation of immune response and host cell cycles. *Infect Immun*. 2004;72(1):498-507.
34. Rikihisa Y. Molecular events involved in cellular invasion by *Ehrlichia chaffeensis* and *Anaplasma phagocytophilum*. *VetParasitol*. 2010;167(2-4):155-66.

35. Kling JC, Blumenthal A. Roles of WNT, NOTCH, and Hedgehog signaling in the differentiation and function of innate and innate-like lymphocytes. *Journal of leukocyte biology*. 2016.
36. Degirmenci B, Valenta T, Dimitrieva S, Hausmann G, Basler K. GLI1-expressing mesenchymal cells form the essential Wnt-secreting niche for colon stem cells. *Nature*. 2018;558(7710):449-53.
37. Gong X, Qian H, Cao P, Zhao X, Zhou Q, Lei J, et al. Structural basis for the recognition of Sonic Hedgehog by human Patched1. *Science*. 2018;361(6402).
38. Veljkovic V, Glisic S, Muller CP, Scotch M, Branch DR, Perovic VR, et al. In silico analysis suggests interaction between Ebola virus and the extracellular matrix. *Front Microbiol*. 2015;6:135.
39. Jimenez-Sanchez M, Menzies FM, Chang YY, Simecek N, Neufeld TP, Rubinsztein DC. The Hedgehog signalling pathway regulates autophagy. *Nat Commun*. 2012;3:1200.
40. Xu XF, Guo CY, Liu J, Yang WJ, Xia YJ, Xu L, et al. Gli1 maintains cell survival by up-regulating IGFBP6 and Bcl-2 through promoter regions in parallel manner in pancreatic cancer cells. *J Carcinog*. 2009;8:13.
41. Rikihisa Y. Subversion of RAB5-regulated autophagy by the intracellular pathogen *Ehrlichia chaffeensis*. *Small GTPases*. 2017:1-7.
42. Svard J, Heby-Henricson K, Persson-Lek M, Rozell B, Lauth M, Bergstrom A, et al. Genetic elimination of Suppressor of fused reveals an essential repressor function in the mammalian Hedgehog signaling pathway. *Developmental cell*. 2006;10(2):187-97.
43. Ruiz i Altaba A, Sanchez P, Dahmane N. Gli and hedgehog in cancer: tumours, embryos and stem cells. *Nature reviews Cancer*. 2002;2(5):361-72.
44. Humke EW, Dorn KV, Milenkovic L, Scott MP, Rohatgi R. The output of Hedgehog signaling is controlled by the dynamic association between Suppressor of Fused and the Gli proteins. *Genes & development*. 2010;24(7):670-82.
45. Soriano ME, Scorrano L. The interplay between BCL-2 family proteins and mitochondrial morphology in the regulation of apoptosis. *Advances in experimental medicine and biology*. 2010;687:97-114.
46. Zhang J-z, Sinha M, Luxon BA, Yu X-j. Survival Strategy of Obligately Intracellular *Ehrlichia chaffeensis*: Novel Modulation of Immune Response and Host Cell Cycles. *Infection and immunity*. 2004;72(1):498-507.
47. Nusslein-Volhard C, Wieschaus E. Mutations affecting segment number and polarity in *Drosophila*. *Nature*. 1980;287(5785):795-801.
48. Aberger F, Kern D, Greil R, Hartmann TN. Canonical and noncanonical Hedgehog/GLI signaling in hematological malignancies. *Vitam Horm*. 2012;88:25-54.
49. Campbell V, Copland M. Hedgehog signaling in cancer stem cells: a focus on hematological cancers. *Stem Cells Cloning*. 2015;8:27-38.
50. Pereira Tde A, Witek RP, Syn WK, Choi SS, Bradrick S, Karaca GF, et al. Viral factors induce Hedgehog pathway activation in humans with viral hepatitis, cirrhosis, and hepatocellular carcinoma. *Laboratory investigation; a journal of technical methods and pathology*. 2010;90(12):1690-703.
51. Holla S, Stephen-Victor E, Prakhar P, Sharma M, Saha C, Udupa V, et al. Mycobacteria-responsive sonic hedgehog signaling mediates programmed death-ligand 1- and prostaglandin E2-induced regulatory T cell expansion. *Sci Rep*. 2016;6:24193.

52. Kim HY, Cho HK, Hong SP, Cheong J. Hepatitis B virus X protein stimulates the Hedgehog-Gli activation through protein stabilization and nuclear localization of Gli1 in liver cancer cells. *Cancer letters*. 2011;309(2):176-84.
53. Choi SS, Bradrick S, Qiang G, Mostafavi A, Chaturvedi G, Weinman SA, et al. Up-regulation of Hedgehog pathway is associated with cellular permissiveness for hepatitis C virus replication. *Hepatology*. 2011;54(5):1580-90.
54. Byerly CD, Patterson LL, McBride JW. Ehrlichia TRP effectors: moonlighting, mimicry and infection. *Pathog Dis*. 2021;79(5).
55. Zhulyn O, Nieuwenhuis E, Liu YC, Angers S, Hui CC. Ptch2 shares overlapping functions with Ptch1 in Smo regulation and limb development. *Dev Biol*. 2015;397(2):191-202.
56. Kawamura S, Hervold K, Ramirez-Weber FA, Kornberg TB. Two patched protein subtypes and a conserved domain of group I proteins that regulates turnover. *J Biol Chem*. 2008;283(45):30964-9.
57. Carpenter D, Stone DM, Brush J, Ryan A, Armanini M, Frantz G, et al. Characterization of two patched receptors for the vertebrate hedgehog protein family. *Proc Natl Acad Sci U S A*. 1998;95(23):13630-4.
58. Karagoz Z, Geuens T, LaPointe VLS, van Griensven M, Carlier A. Win, Lose, or Tie: Mathematical Modeling of Ligand Competition at the Cell-Extracellular Matrix Interface. *Front Bioeng Biotechnol*. 2021;9:657244.
59. Pathi S, Pagan-Westphal S, Baker DP, Garber EA, Rayhorn P, Bumcrot D, et al. Comparative biological responses to human Sonic, Indian, and Desert hedgehog. *Mech Dev*. 2001;106(1-2):107-17.
60. Kumar V, Vashishta M, Kong L, Wu X, Lu JJ, Guha C, et al. The Role of Notch, Hedgehog, and Wnt Signaling Pathways in the Resistance of Tumors to Anticancer Therapies. *Front Cell Dev Biol*. 2021;9:650772.
61. Carballo GB, Honorato JR, de Lopes GPF, Spohr T. A highlight on Sonic hedgehog pathway. *Cell Commun Signal*. 2018;16(1):11.
62. Beachy PA, Hymowitz SG, Lazarus RA, Leahy DJ, Siebold C. Interactions between Hedgehog proteins and their binding partners come into view. *Genes Dev*. 2010;24(18):2001-12.
63. Szalkowski AM, Anisimova M. Graph-based modeling of tandem repeats improves global multiple sequence alignment. *Nucleic Acids Res*. 2013;41(17):e162.
64. Boch J, Scholze H, Schornack S, Landgraf A, Hahn S, Kay S, et al. Breaking the code of DNA binding specificity of TAL-type III effectors. *Science*. 2009;326(5959):1509-12.
65. Mak AN, Bradley P, Bogdanove AJ, Stoddard BL. TAL effectors: function, structure, engineering and applications. *Curr Opin Struct Biol*. 2013;23(1):93-9.
66. Bishoy Wadie VK, Elissavet Sandaltzopoulou, Caroline Benz, Evangelia Petsalaki. Use of viral motif mimicry improves the proteome-wide discovery of human linear motifs. *bioRxiv*. 2021.
67. Davey NE, Cyert MS, Moses AM. Short linear motifs - ex nihilo evolution of protein regulation. *Cell Commun Signal*. 2015;13:43.
68. Yoshiie K, Kim HY, Mott J, Rikihisa Y. Intracellular infection by the human granulocytic ehrlichiosis agent inhibits human neutrophil apoptosis. *Infect Immun*. 2000;68(3):1125-33.



69. Balcewicz-Sablinska MK, Keane J, Kornfeld H, Remold HG. Pathogenic *Mycobacterium tuberculosis* evades apoptosis of host macrophages by release of TNF-R2, resulting in inactivation of TNF-alpha. *Journal of immunology*. 1998;161(5):2636-41.
70. Sly LM, Hingley-Wilson SM, Reiner NE, McMaster WR. Survival of *Mycobacterium tuberculosis* in host macrophages involves resistance to apoptosis dependent upon induction of antiapoptotic Bcl-2 family member Mcl-1. *Journal of immunology*. 2003;170(1):430-7.
71. Clifton DR, Goss RA, Sahni SK, van Antwerp D, Baggs RB, Marder VJ, et al. NF-kappa B-dependent inhibition of apoptosis is essential for host cell survival during *Rickettsia rickettsii* infection. *Proceedings of the National Academy of Sciences of the United States of America*. 1998;95(8):4646-51.
72. Fan T, Lu H, Hu H, Shi L, McClarty GA, Nance DM, et al. Inhibition of apoptosis in chlamydia-infected cells: blockade of mitochondrial cytochrome c release and caspase activation. *The Journal of experimental medicine*. 1998;187(4):487-96.
73. Bergsbaken T, Cookson BT. Macrophage activation redirects yersinia-infected host cell death from apoptosis to caspase-1-dependent pyroptosis. *PLoS pathogens*. 2007;3(11):e161.
74. Liu H, Bao W, Lin M, Niu H, Rikihisa Y. Ehrlichia type IV secretion effector ECH0825 is translocated to mitochondria and curbs ROS and apoptosis by upregulating host MnSOD. *Cell Microbiol*. 2012;14(7):1037-50.
75. Voth DE, Broederdorf LJ, Graham JG. Bacterial Type IV secretion systems: versatile virulence machines. *Future Microbiol*. 2012;7(2):241-57.
76. Mogga SJ, Mustafa T, Sviland L, Nilsen R. Increased Bcl-2 and reduced Bax expression in infected macrophages in slowly progressive primary murine *Mycobacterium tuberculosis* infection. *Scand J Immunol*. 2002;56(4):383-91.
77. Poirier V, Bach H, Av-Gay Y. *Mycobacterium tuberculosis* promotes anti-apoptotic activity of the macrophage by PtpA protein-dependent dephosphorylation of host GSK3alpha. *J Biol Chem*. 2014;289(42):29376-85.
78. Trnski D, Sabol M, Gojevic A, Martinic M, Ozretic P, Musani V, et al. GSK3beta and Gli3 play a role in activation of Hedgehog-Gli pathway in human colon cancer - Targeting GSK3beta downregulates the signaling pathway and reduces cell proliferation. *Biochim Biophys Acta*. 2015;1852(12):2574-84.
79. Stecca B, Ruiz i Altaba A. A GLI1-p53 inhibitory loop controls neural stem cell and tumour cell numbers. *The EMBO journal*. 2009;28(6):663-76.
80. Sheng W, Dong M, Zhou J, Li X, Liu Q, Dong Q, et al. The clinicopathological significance and relationship of Gli1, MDM2 and p53 expression in resectable pancreatic cancer. *Histopathology*. 2014;64(4):523-35.
81. Kuriakose JA, Miyashiro S, Luo T, Zhu B, McBride JW. Ehrlichia chaffeensis transcriptome in mammalian and arthropod hosts reveals differential gene expression and post transcriptional regulation. *PLoS One*. 2011;6(9):e24136.
82. McBride JW, Ndip LM, Popov VL, Walker DH. Identification and functional analysis of an immunoreactive DsbA-like thio-disulfide oxidoreductase of Ehrlichia spp. *Infect Immun*. 2002;70(5):2700-3.
83. Luo T, Zhang X, McBride JW. Major species-specific antibody epitopes of the Ehrlichia chaffeensis p120 and E. canis p140 orthologs in surface-exposed tandem repeat regions. *Clin Vaccine Immunol*. 2009;16(7):982-90.

84. Luo T, McBride JW. *Ehrlichia chaffeensis* TRP32 interacts with host cell targets that influence intracellular survival. *Infect Immun*. 2012;80(7):2297-306.
85. Luo T, Dunphy PS, McBride JW. *Ehrlichia chaffeensis* Tandem Repeat Effector Targets Differentially Influence Infection. *Front Cell Infect Microbiol*. 2017;7:178.
86. Mitra S, Dunphy PS, Das S, Zhu B, Luo T, McBride JW. *Ehrlichia chaffeensis* TRP120 Effector Targets and Recruits Host Polycomb Group Proteins for Degradation To Promote Intracellular Infection. *Infect Immun*. 2018;86(4).
87. Li Q, Lau A, Morris TJ, Guo L, Fordyce CB, Stanley EF. A syntaxin 1, Galpha(o), and N-type calcium channel complex at a presynaptic nerve terminal: analysis by quantitative immunocolocalization. *J Neurosci*. 2004;24(16):4070-81.
88. Burgess A, Vigneron S, Brioude E, Labbe JC, Lorca T, Castro A. Loss of human Greatwall results in G2 arrest and multiple mitotic defects due to deregulation of the cyclin B-Cdc2/PP2A balance. *Proceedings of the National Academy of Sciences of the United States of America*. 2010;107(28):12564-9.
89. Liu W, Xie Y, Ma J, Luo X, Nie P, Zuo Z, et al. IBS: an illustrator for the presentation and visualization of biological sequences. *Bioinformatics*. 2015;31(20):3359-61.

## Figure Legends

### **Fig. 1. TRP120 TR motif shares sequence and functional similarity with Hh ligands.**

(A) Schematic representation of TRP120 showing domain organization. TRP120 consists of a N-terminal (NT), C-terminal (CT) and tandem repeat (TR1 – 4; 80 aa each) domain, flanked with two partial repeats (PR) (89). NCBI Protein BLAST identified an 8 amino acid short linear motif (SLiM) of high similarity between the TRP120 TR and Hh ligand amino acid sequences corresponding to the location of Hh ligand and Hh PTCH receptor-binding site (37, 62). Complete amino acid sequence of one TR is shown with homologous Hh SLiM identified in blue. Blue shaded TR regions shown in schematic indicate location of Hh SLiM. Table summarizes amino acid sequence similarity between Hh ligands and TRP120; (B-D) ISM analysis of TRP120 and Dhh/lhh; (B) Cross-spectrum of TRP120 (accession no. AAO12927.1) and Dhh (NP\_066382) with ISM frequencies (x axis) plotted against normalized amplitude for each component (y axis); (C) Cross-spectrum of TRP120 and lhh (NP\_002172) with ISM frequencies (x axis) plotted against normalized amplitude for each component (y axis); (D) Scanning of the amino acid sequence of Dhh/lhh along ISM F[0.457] immediately upstream of the TRP120 Hh SLiM. The TRP120 TR region is defined in red.

### **Fig. 2. iRNA knockdown of Hh signaling components inhibits *E. chaffeensis* infection.**

(A) Small interfering RNA-transfected (siRNA) THP-1 cells were infected or mock infected (-) with *E. chaffeensis* (MOI 100, 24 h post-transfection). Scrambled siRNA

(scrRNA) was transfected for positive (infected) and negative control (mock infected). *E. chaffeensis* infection was quantified at 24 hpi and was determined by qPCR amplification of the *dsb* gene. siRNA knockdown (KD) of Hh receptors PTCH2, SMO, and transcription factors GLI-1/2/3 significantly inhibits *E. chaffeensis* infection in THP-1 cells. All knockdowns were performed with at least three biological and technical replicates for *t*-test analysis. Data are represented as means  $\pm$  SD (\*\* $p < 0.001$ ). (B) Western blot depicts KD efficiency of siRNA in KD cells compared to positive control from whole-cell lysates harvested 24 hpi. Number left of siRNA lane indicates percent knockdown of protein of interest relative to positive control, normalized to GAPDH expression.

**Fig. 3. TRP120 interacts directly with Hh receptor PTCH2.**

(A) Immunofluorescence micrographs showing the distribution of TRP120 and PTCH2 receptor in uninfected and *E. chaffeensis*-infected cells. Co-localization of *E. chaffeensis* expressing TRP120 (green) with Hh receptor PTCH2 (red) at the ehrlichial inclusion was observed at 48 hpi compared to uninfected cells. Pearson's correlation coefficient (PCC) indicates a very strong correlation between TRP120 and PTCH2, suggesting a direct interaction (scale bar, 10 $\mu$ m). (B) Immunofluorescence analysis of GFP tagged TRP120 transfected HeLa cells. GFP-TRP120 or GFP (ctrl) expressing HeLa cells were immunostained with PTCH2 specific antibody and observed by epifluorescence microscopy. Colocalization of GFP-tagged TRP120 (green) with the PTCH2 receptor (red) was observed in HeLa cells. (A-B) Experiments were performed with at least three biological and technical replicates. Randomized areas/slide (n=10)

were used to detect interaction. (C) Co-IP and reverse Co-IP demonstrate the direct interaction between TRP120 and PTCH2 at 24 hpi compared to the IgG negative control. Western blot analysis was normalized to GAPDH expression and experiment was repeated with three biological replicates. (D) Surface plasmon resonance (SPR) was utilized to detect the direct interaction of rPTCH2 with rTRP120-TR or rPTCH2 with rTrx (-). rPTCH2 was immobilized on a nickel chip followed by the injection of an analyte solution containing solubilized rTRP120-TR or rTrx (-) to determine the binding affinity ( $K_D$ ). The binding affinity demonstrates a strong interaction between rPTCH2 and rTRP120-TR. The results were expressed as the means  $\pm$  standard deviation (SD) of data obtained from three independent experiments

**Fig. 4. *E. chaffeensis* activates the Hh signaling pathway in THP-1 cells and PHMs.**

(A) Confocal microscopy of uninfected and *E. chaffeensis* infected THP-1 cells stained with anti-GLI-1 antibody at 2, 4, 10, 24 and 48 hpi, showing a temporal increase in GLI-1 compared to the uninfected controls. Uninfected and *E. chaffeensis* infected THP-1 cells were stained with anti-DSB antibody (red) at 2, 4, 10, 24 and 48 hpi demonstrating infection of THP-1 cells with *E. chaffeensis* (scale bar = 10  $\mu$ m). (B) Confocal microscopy of uninfected and *E. chaffeensis*-infected PHMs at 10 hpi showing activation of GLI-1 (green). Uninfected and *E. chaffeensis*-infected PHMs were stained with anti-DSB antibody (red) to confirm *E. chaffeensis* infection (scale bar = 10  $\mu$ m). (A-B) Experiments were performed with at least three biological and technical replicates. Randomized areas/slide (n=10) were used to detect GLI-1 nuclear translocation.

**Fig. 5. Expression array analysis of Hh-signaling genes during *E. chaffeensis* infection.**

(A) Volcano plots showing the differential expression of Hh-signaling pathway genes between *E. chaffeensis*-infected and uninfected THP-1 cells at 4 h (top left), 8 h (top right), 24 h (bottom left) and 48 hpi (bottom right). The red, black and green dots in the volcano plot represent upregulation ( $\geq 2$ ), no change, and down-regulation ( $\leq -2$ ), respectively. The horizontal blue lines on the volcano plots determine the level of significance ( $\leq 0.05$ ). Genes were significantly upregulated at all time points. (B) Normalized expression of Hh array genes in component, target and associated gene categories between *E. chaffeensis*-infected and uninfected cells at 48 hpi. Cells were harvested with three biological and technical replicates for all time points.

**Fig. 6. *E. chaffeensis* infection alters levels of Hh-signaling components in THP-1 cells.**

(A) Western blot analysis of GLI-1 levels in uninfected and *E. chaffeensis*-infected THP-1 cell nuclear fractions collected at 0, 2, 4, 10, 24 and 48 hpi with PCNA as a nuclear control. Western blot analysis of cytoplasmic fraction levels of SMO, SUFU and Shh in uninfected and *E. chaffeensis*-infected THP-1 cells at 0, 2, 4, 10, 24 and 48 hpi with GAPDH as a loading control. (B) Bar graphs depicting Western blot densitometry values were normalized to PCNA or GAPDH, respectively. (A-B) Western blots were performed with at least three biological and technical replicates for *t*-test analysis. Data are represented as means  $\pm$  SD (\* $p < 0.05$ ).

**Fig. 7. *E. chaffeensis* TRP120 activates GLI-1 and Hh gene target expression consistent with Hh ligands.**

(A) Confocal immunofluorescence microscopy of untreated (-) or rTRP120-FL-, rTrx- (-), rShh-treated (+) (1  $\mu\text{g}/\text{mL}$ ) THP-1 cells stained with GLI-1 antibody. Micrographs demonstrate increased levels of GLI-1 (green) in rTRP120- and rShh-treated THP-1 cells 6 h post-treatment (hpt) (scale bar = 10  $\mu\text{m}$ ). (B) Confocal immunofluorescence microscopy of untreated, rTRP120-FL, Trx- (-) and rShh-treated (+) (1  $\mu\text{g}/\text{mL}$ ) PHMs harvested at 10 h. rTRP120-FL activation of GLI-1 (green) similar to rShh (positive control) in PHMs (scale bar = 10  $\mu\text{m}$ ). (A-B) Experiments were performed with at least three biological and technical replicates. Randomized areas/slide ( $n=10$ ) were used to detect GLI-1 nuclear translocation. (C) The volcano plot is representing Hh signaling PCR array gene expression in THP-1 cells stimulated with rTRP120-FL (1  $\mu\text{g}/\text{mL}$ ) after normalization to control cells treated with rTrx (1  $\mu\text{g}/\text{mL}$ ). The respective normalized expression of rTRP120-FL regulated Hh array genes were performed with three biological and technical replicates. (D) The volcano plot is representing Hh signaling PCR array gene expression in cells stimulated with rShh (1  $\mu\text{g}/\text{mL}$ ) after normalized to DMSO (control) treated cell. The respective normalized expression of rShh regulated Hh array genes were performed in biological and technical replicates. (C-D) The red, black and green dots in the volcano plot represents an upregulation ( $\geq 2$ ), no change and down-regulation ( $\leq -2$ ), respectively for a given gene on the array. The horizontal blue lines on the volcano plots determine the level of significance ( $p \leq 0.05$ ).

**Fig. 8. TRP120 Hh SLiM activates GLI-1 in THP-1 cells and PHMs.**

(A) TRP120-TR-Hh and TRP120-Hh-SLiM sequences contain the Hh homology sequence identified by BLAST analysis. TRP120-Hh-SLiM-mut contains guanine and adenine substitutions in the Hh SLiM region and is used as a negative control. TRP120-TR (-) is a sequence within the TRP120-TR that does not contain the defined Hh homology sequence. (B) Confocal immunofluorescence microscopy of untreated (-) or peptide treated THP-1 cells. THP-1 cells were stained with GLI-1 antibody. The micrograph shows increased levels of GLI-1 (green) in TRP120-TR-Hh and TRP120-Hh-SLiM treated, but not untreated, TRP120-TR (-) or TRP120-Hh-SLiM-mut treated THP-1 cells 6 h post-treatment (hpt) (scale bar = 10  $\mu$ m). (C) Confocal immunofluorescence microscopy of untreated or SLiM/SLiM mutant peptide treated PHMs harvested at 10 h. The TRP120-Hh-SLiM sequence activates GLI-1 (green) in PHMs, but the corresponding mutant sequence does not (scale bar = 10  $\mu$ m). (B-C) Experiments were performed with at least three biological and technical replicates. Randomized areas/slide (n=10) were used to detect GLI-1 nuclear translocation. (D-E) Hh signaling PCR arrays were utilized to analyze the expression of 84 Hh genes during infection. In brief, THP-1 cells were treated with TRP120-Hh-SLiM or TRP120-Hh-SLiM-mut (50 and 500 ng/mL) or left untreated (negative control). THP-1 cells were harvested at 6 h with three biological and technical replicates. The tables represent the fold change in gene expression at each concentration. (D) The upregulation of gene expression in TRP120-Hh-SLiM-treated cells compared to untreated cells at respective concentrations. (E) Upregulation of gene expression in TRP120-Hh-SLiM treated cells compared to TRP120-Hh-SLiM-mut treated cells at respective concentrations.



**Fig. 9. Anti-TRP120 Hh SLiM antibody blocks Hh signaling and GLI-1 nuclear translocation.**

(A) *E. chaffeensis* (MOI 100) and SLiMs were incubated with  $\alpha$ -TRP120-I1 (targets TRP120 sequence SKVEQEETNPEVLIKDLQDVAS) or  $\alpha$ -TRP32 (neg ctrl) (1.5  $\mu$ g/mL) for 1 h before incubation with THP-1 cells. THP-1 cells were harvested at 10 hpt, immunostained with GLI-1 (green), and visualized by confocal fluorescence microscopy. Scale bar = 10  $\mu$ m. 10 randomized areas/slide were used to detect GLI-1 nuclear translocation. (B) Western blot analysis of treatment groups with GAPDH as a loading control. Data are represented as means  $\pm$  SD (\* $p$ <0.05). (A-B);  $\alpha$ -TRP120-I1 inhibits GLI-1 activation in cells with *E. chaffeensis* or TRP120-Hh-SLiM compared to  $\alpha$ -TRP32. Untreated cells were incubated with  $\alpha$ -TRP120-I1 or  $\alpha$ -TRP32 as negative controls. Experiments were performed with at least three biological and technical replicates and significance was determined through *t*-test analysis. Randomized areas/slide (n=10) were used to detect GLI-1 nuclear translocation.

**Fig. 10. *E. chaffeensis* deploys the TRP120 Hh SLiM to induce BCL-2 expression for survival.**

(A) Western blot analysis of BCL-2 levels of *E. chaffeensis* infected THP-1 cells collected at 0, 24, 48 and 72 hpi with GAPDH as a loading control and DSB as an infection control. *E. chaffeensis* induces BCL-2 protein expression. (B) BCL-2 levels of TRP120-Hh-SLiM and TRP120-Hh-SLiM-mut treated and untreated THP-1 cells collected at 12 hpt with GAPDH as a loading control. The TRP120-Hh-SLiM peptide induces BCL-2 protein expression, but the mutant does not. (B, C) Bar graphs depict

Western blot densitometry values normalized to GAPDH. (C) siRNA knockdown (KD) of BCL-2 significantly reduces *E. chaffeensis* infection in THP-1 cells as determined by qPCR amplification of the *dsb* gene. Scrambled siRNA (scrRNA) was transfected for positive (infected) and negative control (mock infected). Western blot depicts KD efficacy of siRNA in KD cells compared to the positive control. Number left of siRNA lane indicates percent KD of BCL-2 relative to positive control, normalized to GAPDH expression. (A-C) Experiments were performed with at least three biological and technical replicates and significance was determined through *t*-test analysis. Data are represented as means  $\pm$  SD (\* $p$  < 0.05; \*\* $p$  < 0.01; \*\*\* $p$  < 0.001)

**Fig. 11. *E. chaffeensis* mediated activation of Hh signaling inhibits host cell apoptosis.**

(A) Immunofluorescence analysis of uninfected and *E. chaffeensis*-infected THP-1 cells stained with JC-1 dye after treatment with 100  $\mu$ M of Etoposide or DMSO control. The micrographs demonstrate the formation of JC aggregates (orange;  $590 \pm 17.5$  nm) in mitochondria with positive membrane potential in DMSO treated cells (top panel). Due to depolarization of the mitochondrial membrane in Etoposide-treated cells, JC-1 remains as a monomer and yields green fluorescence with the emission of  $530 \pm 15$  nm (middle). *E. chaffeensis*-infected Etoposide-treated THP1 cells showed increased cells with JC-1 aggregates, indicating active inhibition of host cell apoptosis during *E. chaffeensis* infection (bottom). (B) Bar graph depicts % normal or apoptotic cells in DMSO, Etoposide or Etoposide + *E. chaffeensis* groups. There were significantly fewer apoptotic cells in DMSO and Etoposide + *E. chaffeensis* groups, but significantly more

apoptotic cells in Etoposide treated groups. Experiments were performed in biological and technical replicates and significance was determined through *t*-test analysis. Data are represented as means  $\pm$  SD ( $*p < 0.05$ ). (C) Immunofluorescence analysis of mitochondrial membrane potential using JC-1 dye in *E. chaffeensis*-infected cells treated with Hh inhibitor Vismodegib or DMSO. The micrograph demonstrated the presence of mitochondria with positive membrane potential in DMSO treated infected cells compared to Vismodegib-treated infected cells. Arrow points to the ehrlichial inclusion. (D) Immunofluorescence analysis of uninfected and *E. chaffeensis*-infected THP-1 cells stained with Nucview488 and the Mitoview633 Dye after treatment with Vismodegib or DMSO control. The micrographs show Nucview488 dye is cleaved by caspase 3 and produces green fluorescence in Vismodegib-treated *E. chaffeensis*-infected cells due to the activation of apoptosis. In comparison, due to positive mitochondrial membrane potential, Mitoview633 accumulated in the inner mitochondrial membrane (red) in Vismodegib-uninfected and DMSO treated (Ctrl) uninfected and infected cells. These results demonstrate that Hh signaling plays a crucial role during *E. chaffeensis* infection by inhibiting intrinsic death signaling. (A, C, D) Experiments were performed with at least three biological and technical replicates. Randomized areas/slide (n=10) were selected to visualize the phenomenon.

**Fig. 12. Apoptotic profile is induced in the presence of Hh inhibitor during *E. chaffeensis* infection.**

(A) Brightfield micrographs showing effects of DMSO or Hh inhibitor Vismodegib on uninfected and *E. chaffeensis* infected cells prepared using Diff-Quick staining.

THP-1 cells were treated with Vismodegib or DMSO (200 nM) and infected with *E. chaffeensis* or uninfected for 24 h. Infected THP-1 cells treated with Vismodegib undergo cytoplasmic condensation (precursor to apoptosis), but other treatment groups do not (arrows point to morulae). (B) Bar graph showing fold-change in *E. chaffeensis* infection for each treatment group. Ehrlichial loads were determined using qPCR measurement of *dsb* copy and normalized with host cell *GAPDH*. *E. chaffeensis* infection significantly declines in the presence of Vismodegib. (C) Bar graphs showing cell viability for each treatment group. Cell viability was determined using the Cellometer Mini bright field imaging and pattern-recognition assay. Cell viability significantly declines in the presence of Vismodegib during *E. chaffeensis* infection. (D) Western blot analysis of BCL-2 levels for each group with GAPDH as a loading control. BCL-2 protein expression significantly declines during *E. chaffeensis* infection in the presence of Vismodegib. (E) Western blot analysis of pro and cleaved caspase 9 levels for each group with GAPDH as a loading control. Pro caspase 9 protein expression significantly declines while cleaved caspase 9 protein expression significantly increases during *E. chaffeensis* infection in the presence of Vismodegib. (F) Western blot analysis of pro and cleaved caspase 3 levels for each group with GAPDH as a loading control. pro caspase 3 protein expression significantly declines while cleaved caspase 3 protein expression significantly increases during *E. chaffeensis* infection in the presence of Vismodegib. (D-F) Bar graphs depict Western blot densitometry values normalized to GAPDH. (B-F) (A-F) Experiments were performed with at least three biological and technical replicates and significance was determined through *t*-test analysis. Data are represented as means  $\pm$  SD (\* $p$ <0.05; \*\* $p$ <0.01; \*\*\* $p$ <0.001).

**Fig. 13. Model of *E. chaffeensis* TRP120 SLiM mimetic activation of Hh signaling, downstream GLI-1 activation and apoptosis inhibition.**

When Hh signaling is off, GLI-1 is negatively regulated by SUFU, which leads to GLI-1 phosphorylation and truncation. Truncated GLI-1 (GLI<sup>R</sup>) translocates to the nucleus, but its repressive form is unable to activate downstream gene targets. Thus, BCL-2 is not expressed, which leads to Bax release of CytC and subsequent activation of caspase cleavage and apoptosis. Therefore, *E. chaffeensis* TRP120 SLiM interacts with the PTCH2 receptor to trigger PTCH2 lysosomal degradation, thereby activating the SMO receptor to prevent SUFU from inhibiting GLI-1. Therefore, transcription factor GLI-1 (GLI<sup>A</sup>) translocates freely to the nucleus to bind DNA and activate Hh gene targets. Further, Hh signaling upregulates activates BCL-2 to prevent apoptosis by maintaining the integrity of the mitochondrial membrane and thus prevents Bax release of cytochrome c (CytC) and involved activation of the intrinsic caspase cascade (caspase 9, Caspase 3).

## Figures

### Fig.1

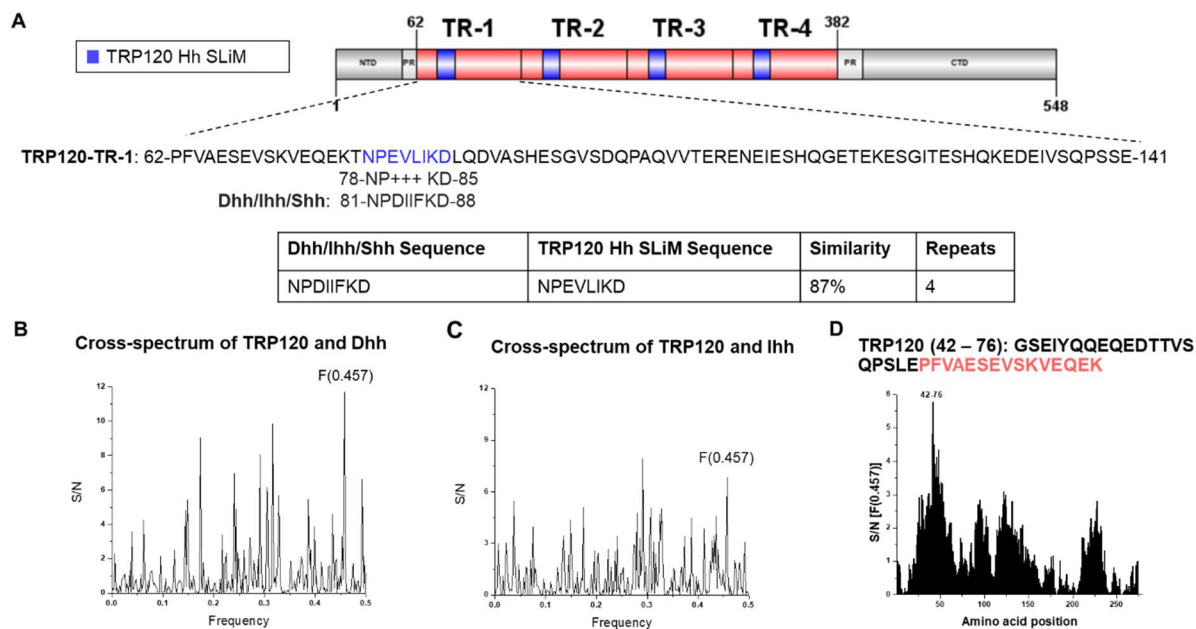

### Fig. 2

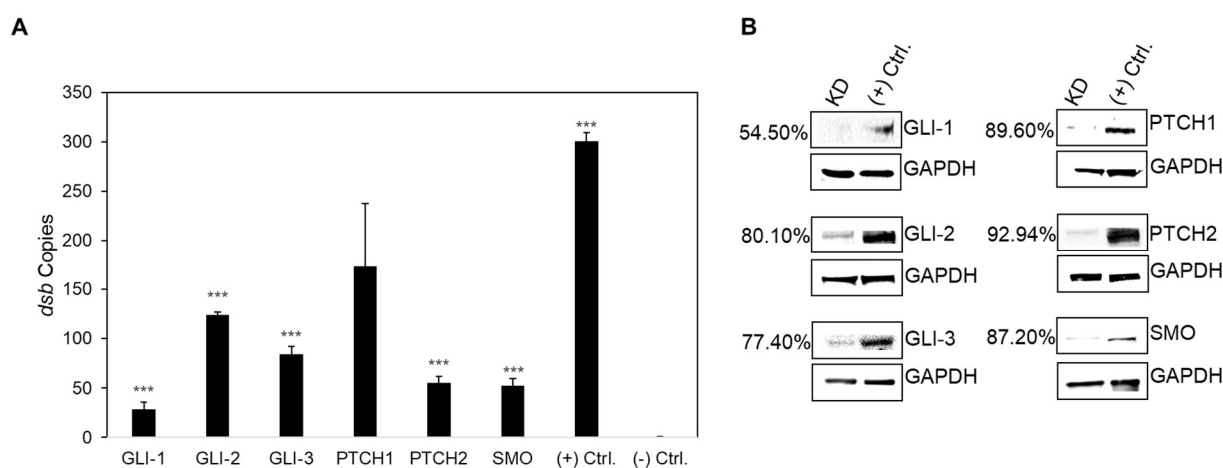

**Fig. 3**

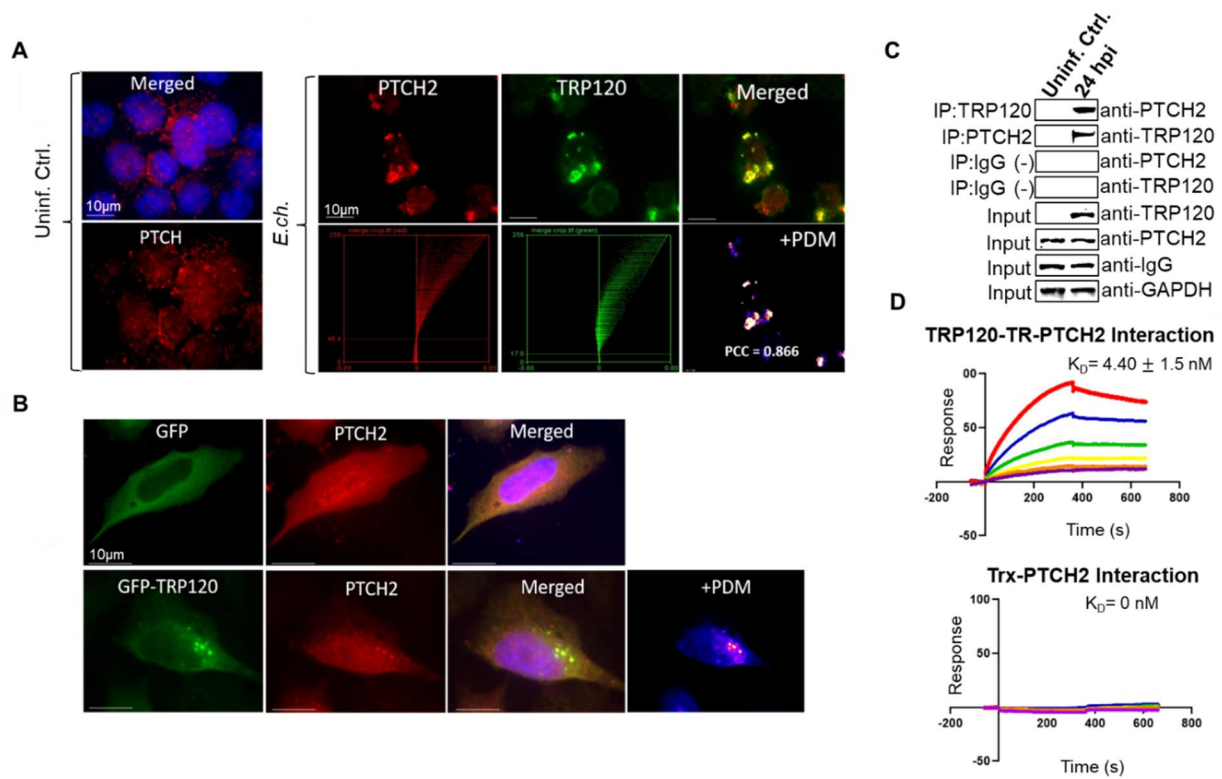

**Fig. 4**

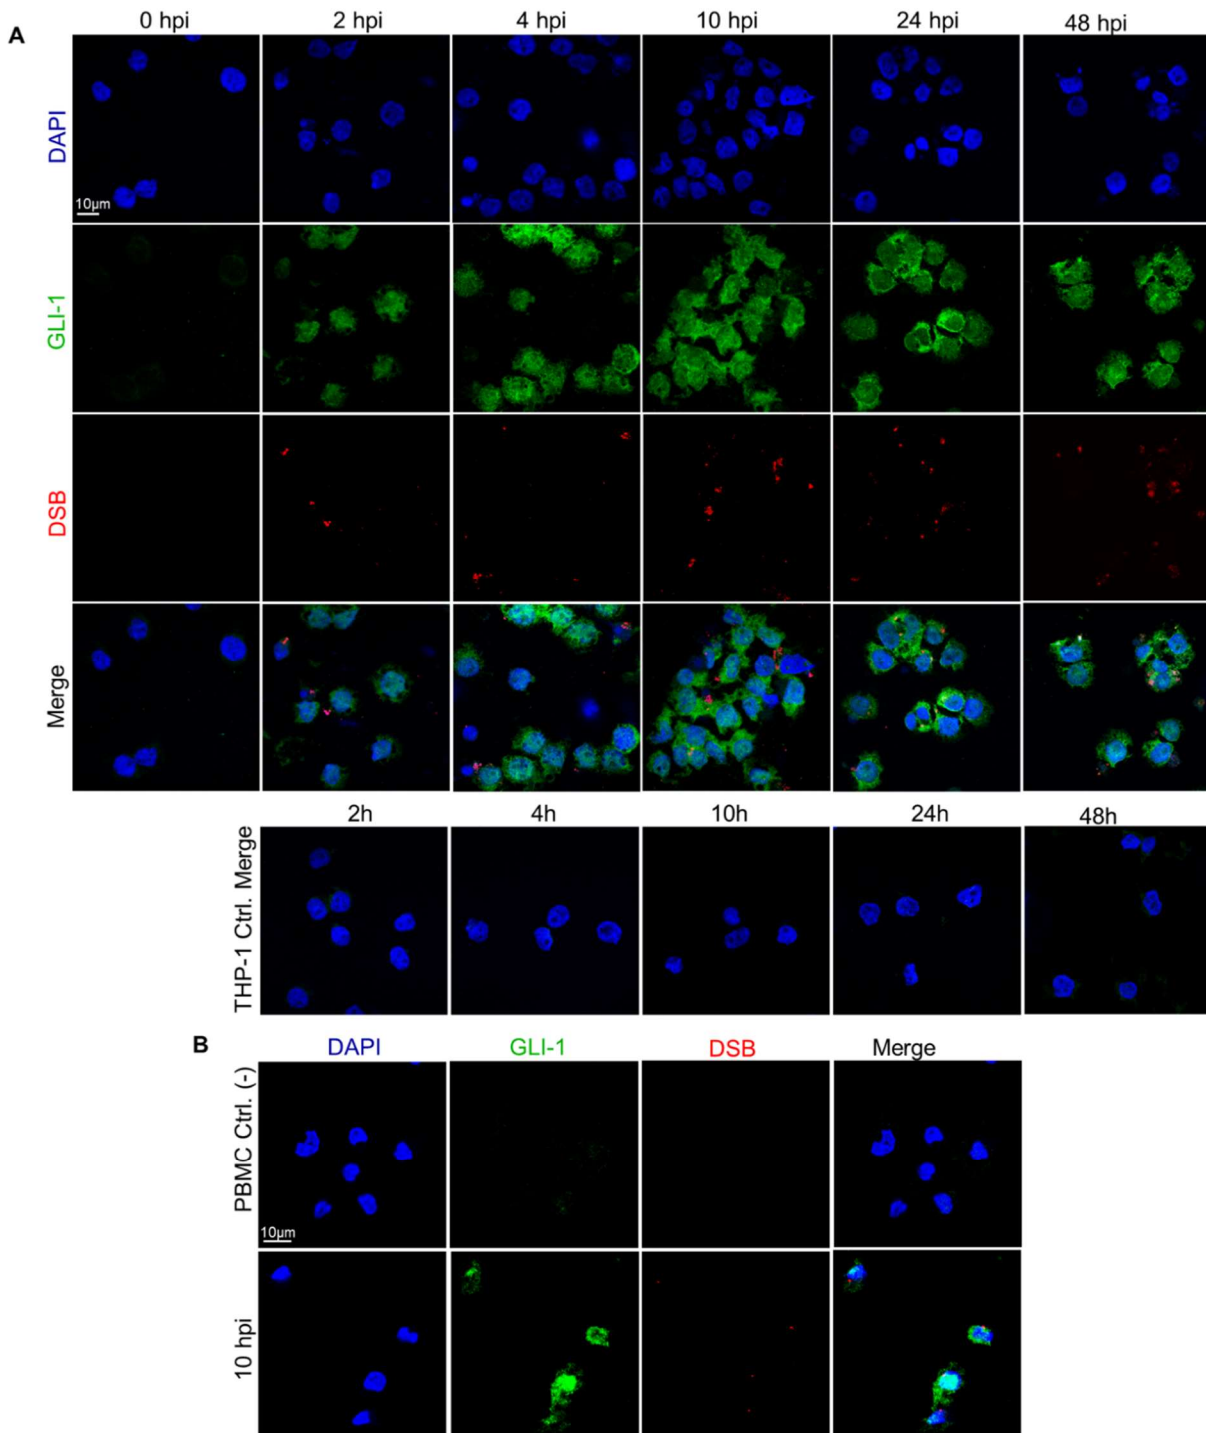



**Fig. 5**

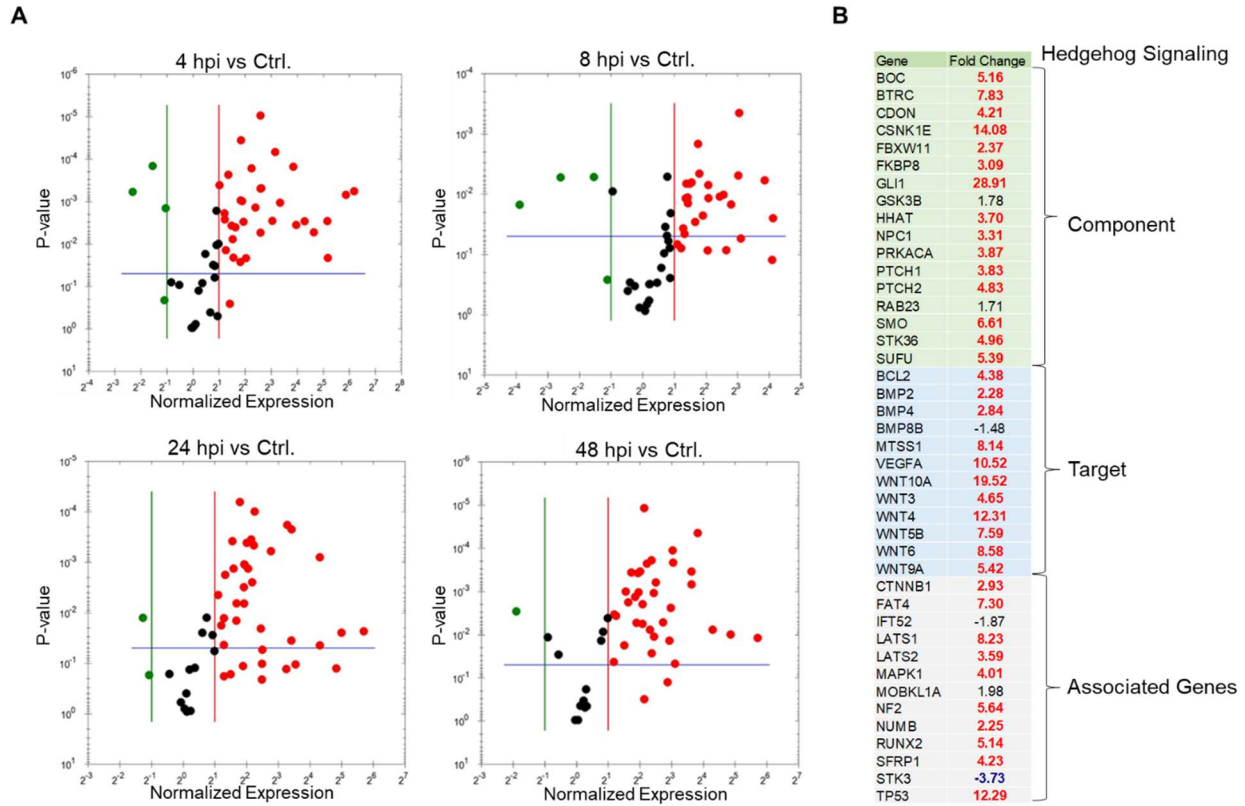

**Fig. 6**

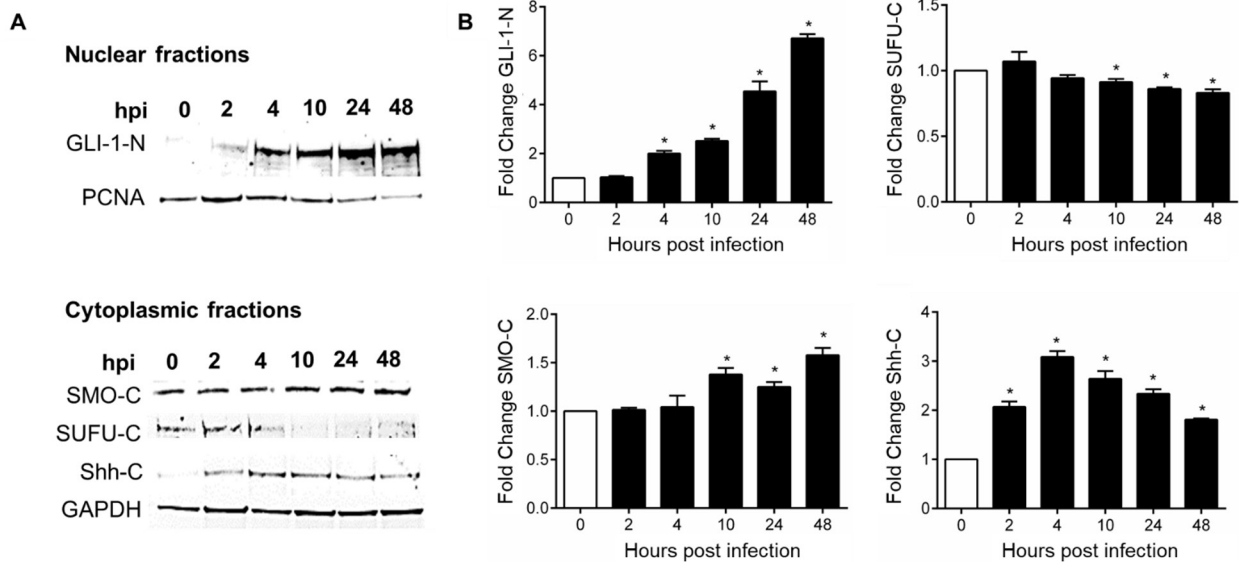

**Fig. 7**

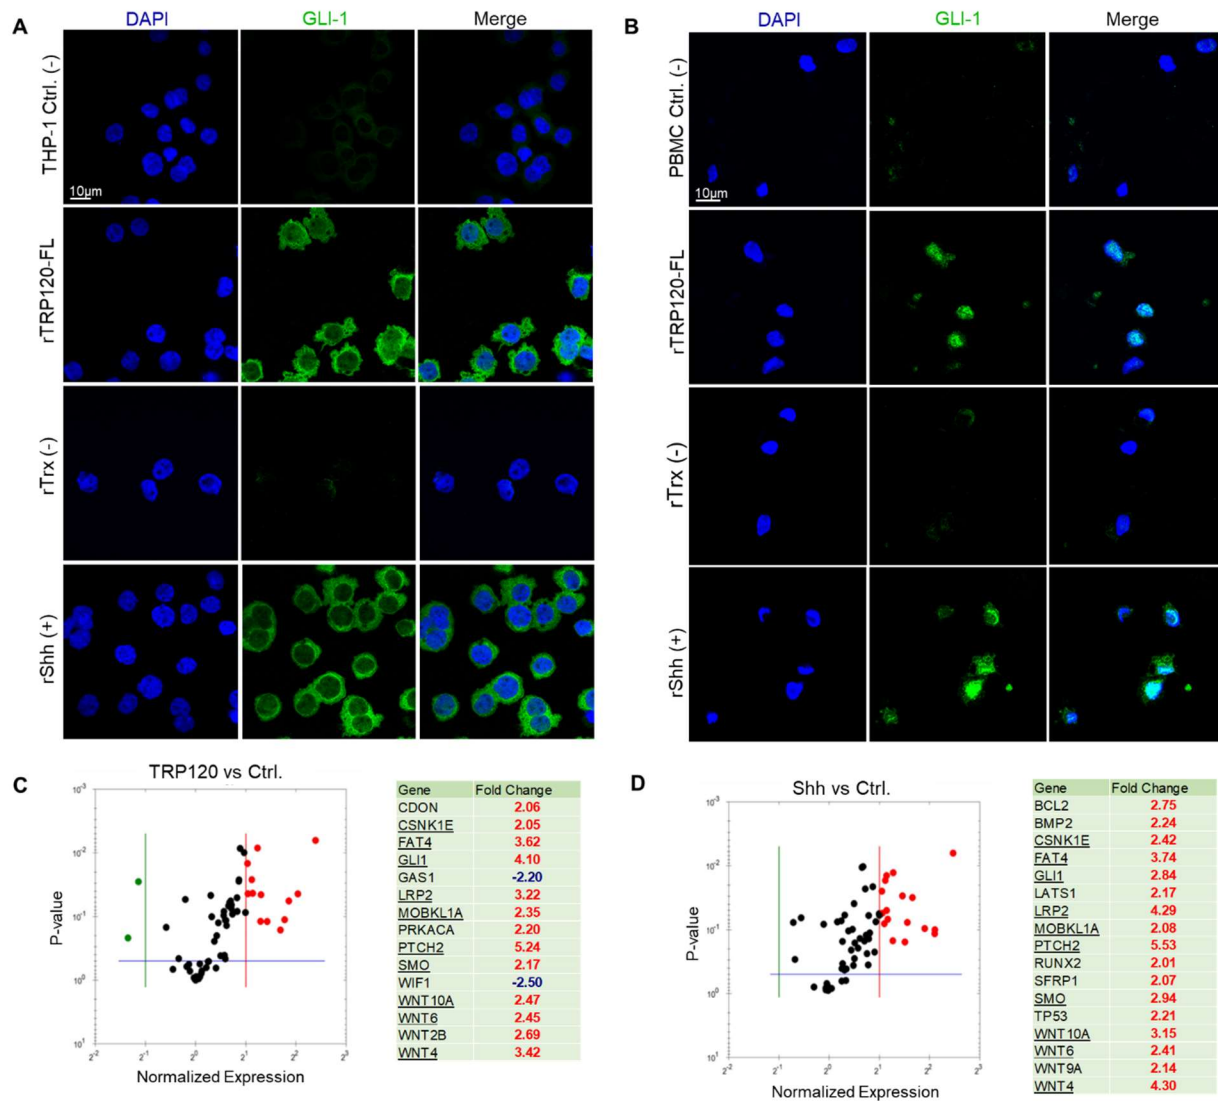

**Fig. 8**

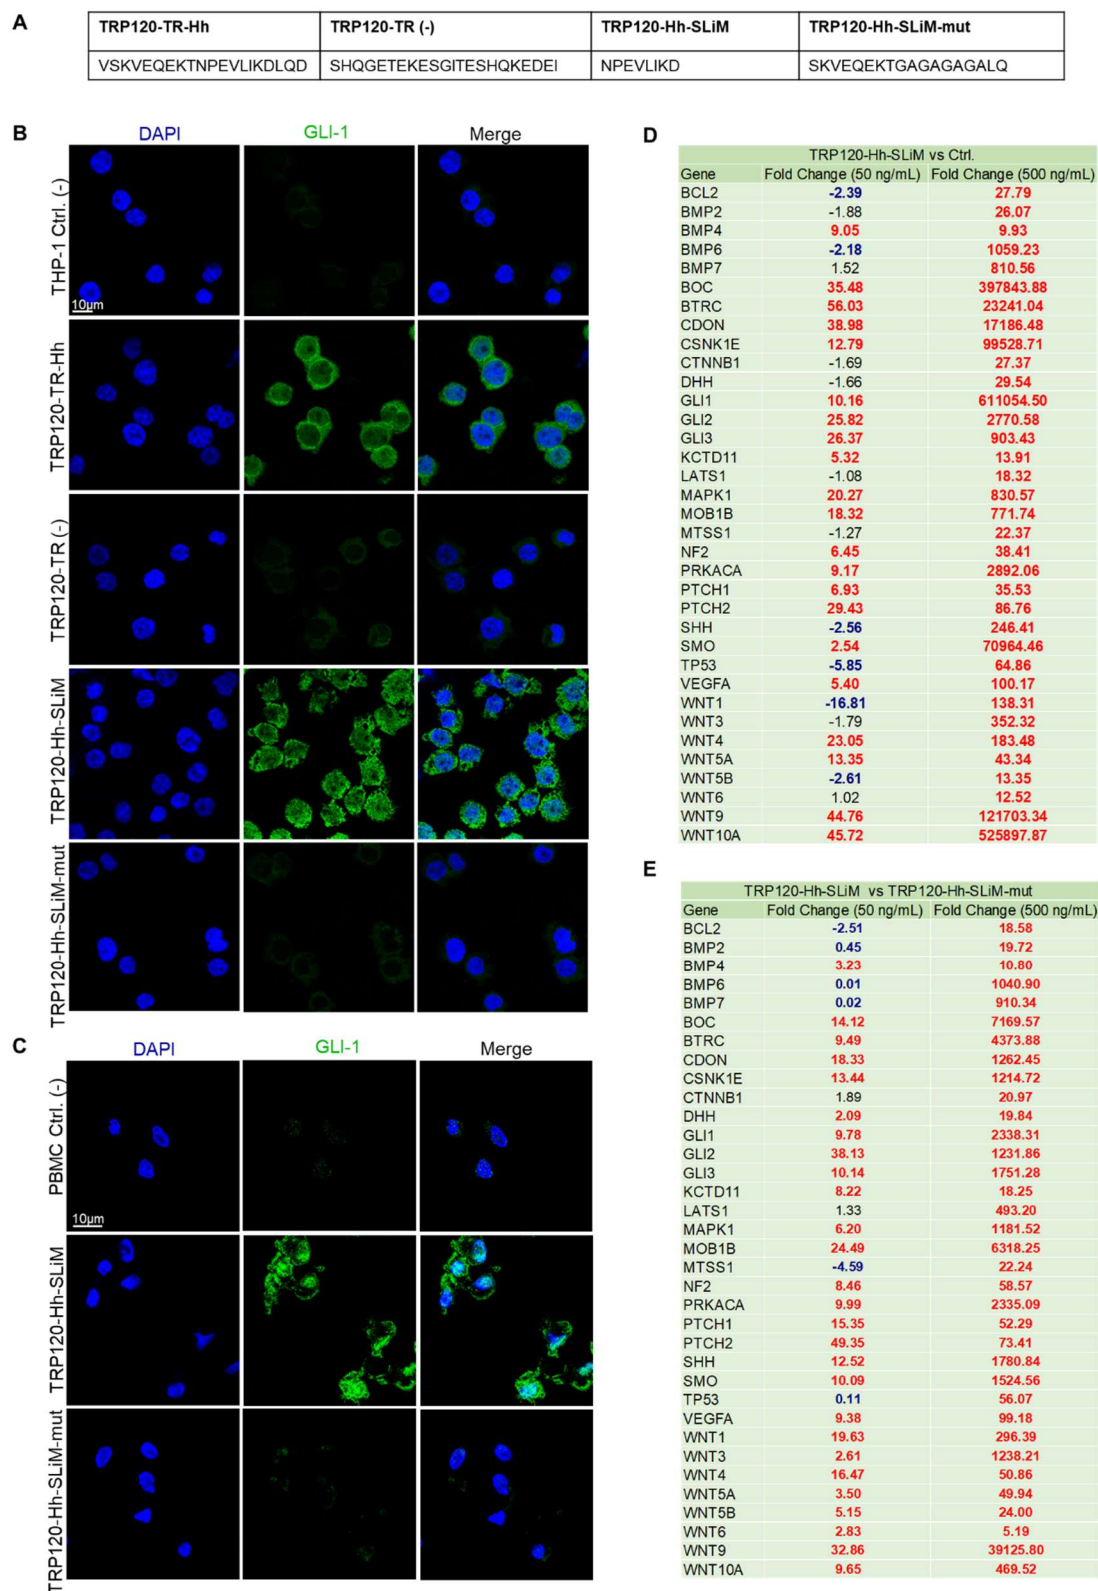

**Fig. 9**

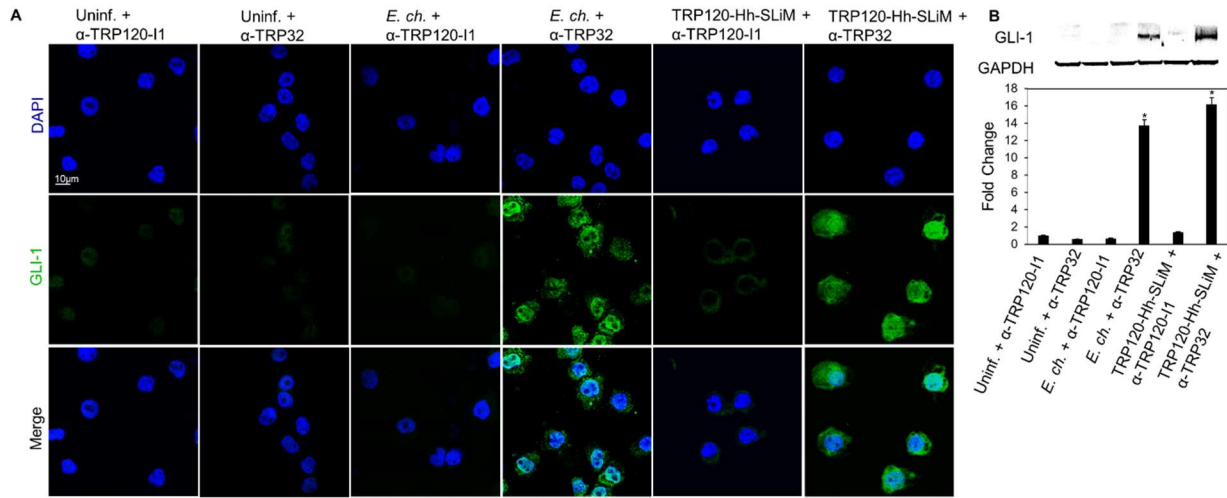

**Fig. 10**

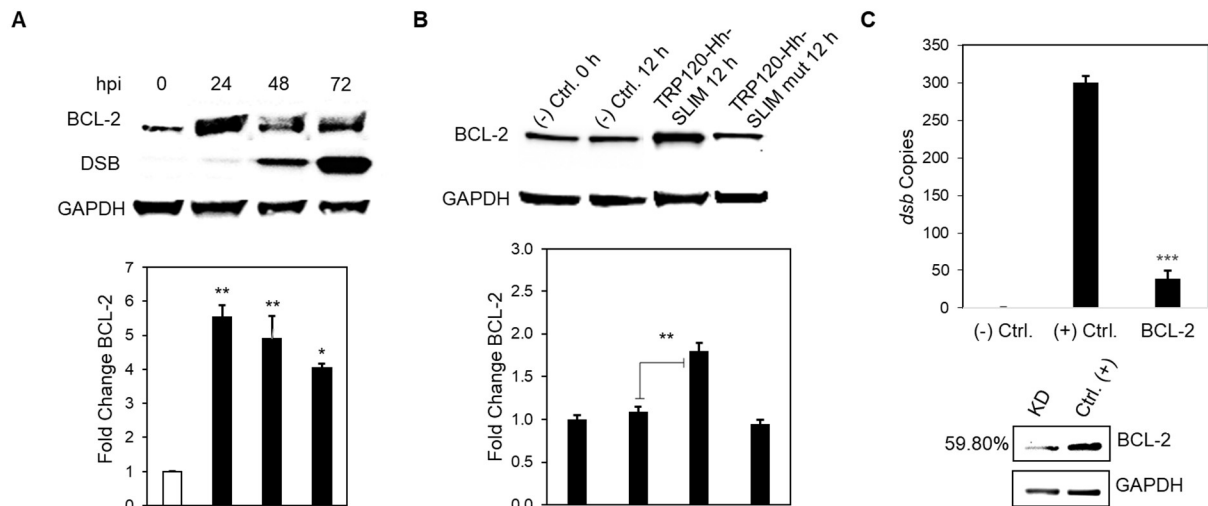

**Fig. 11**

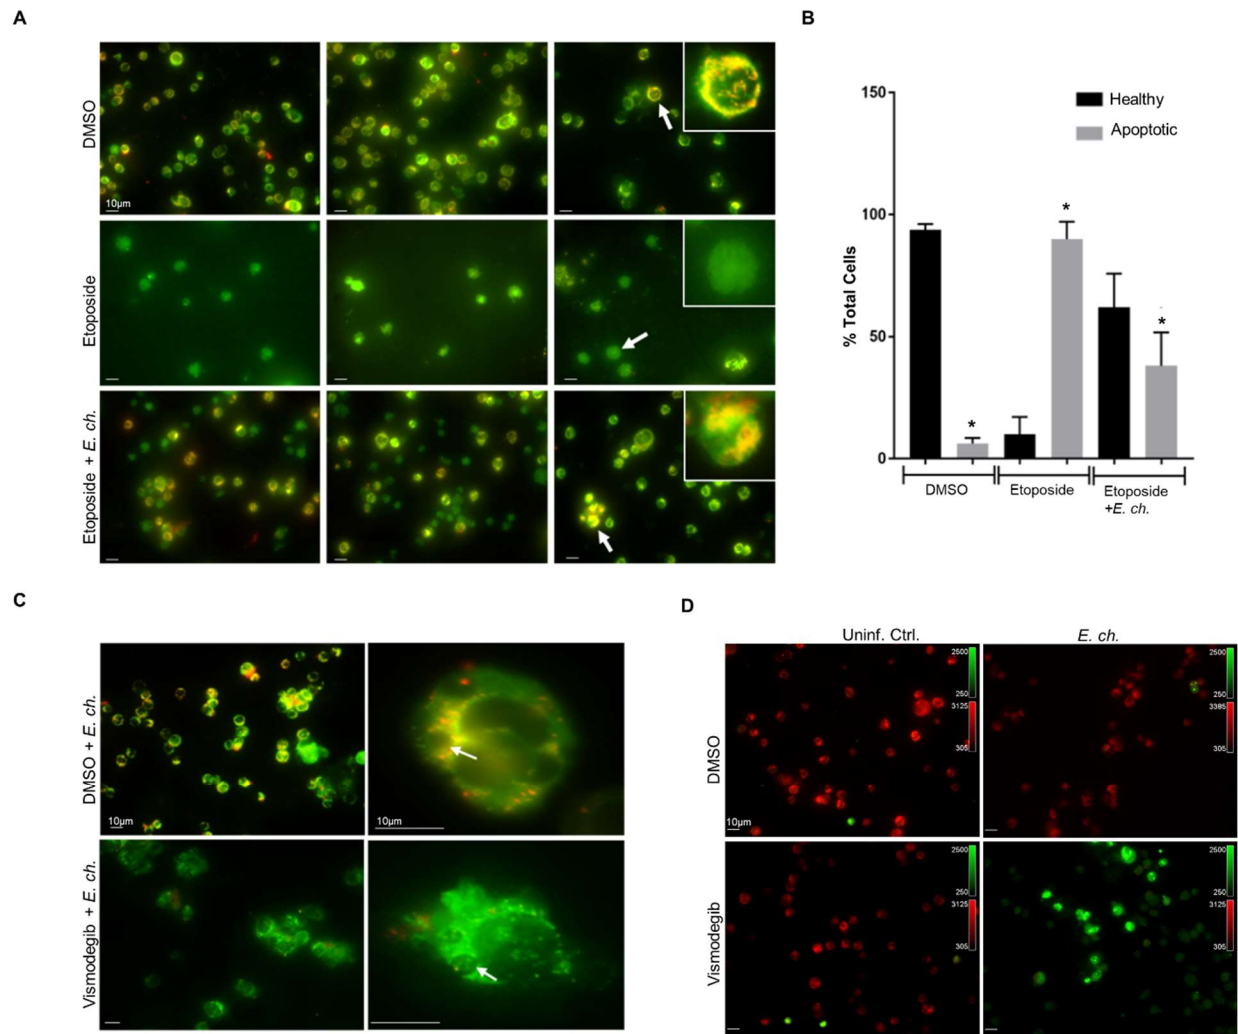

**Fig. 12**

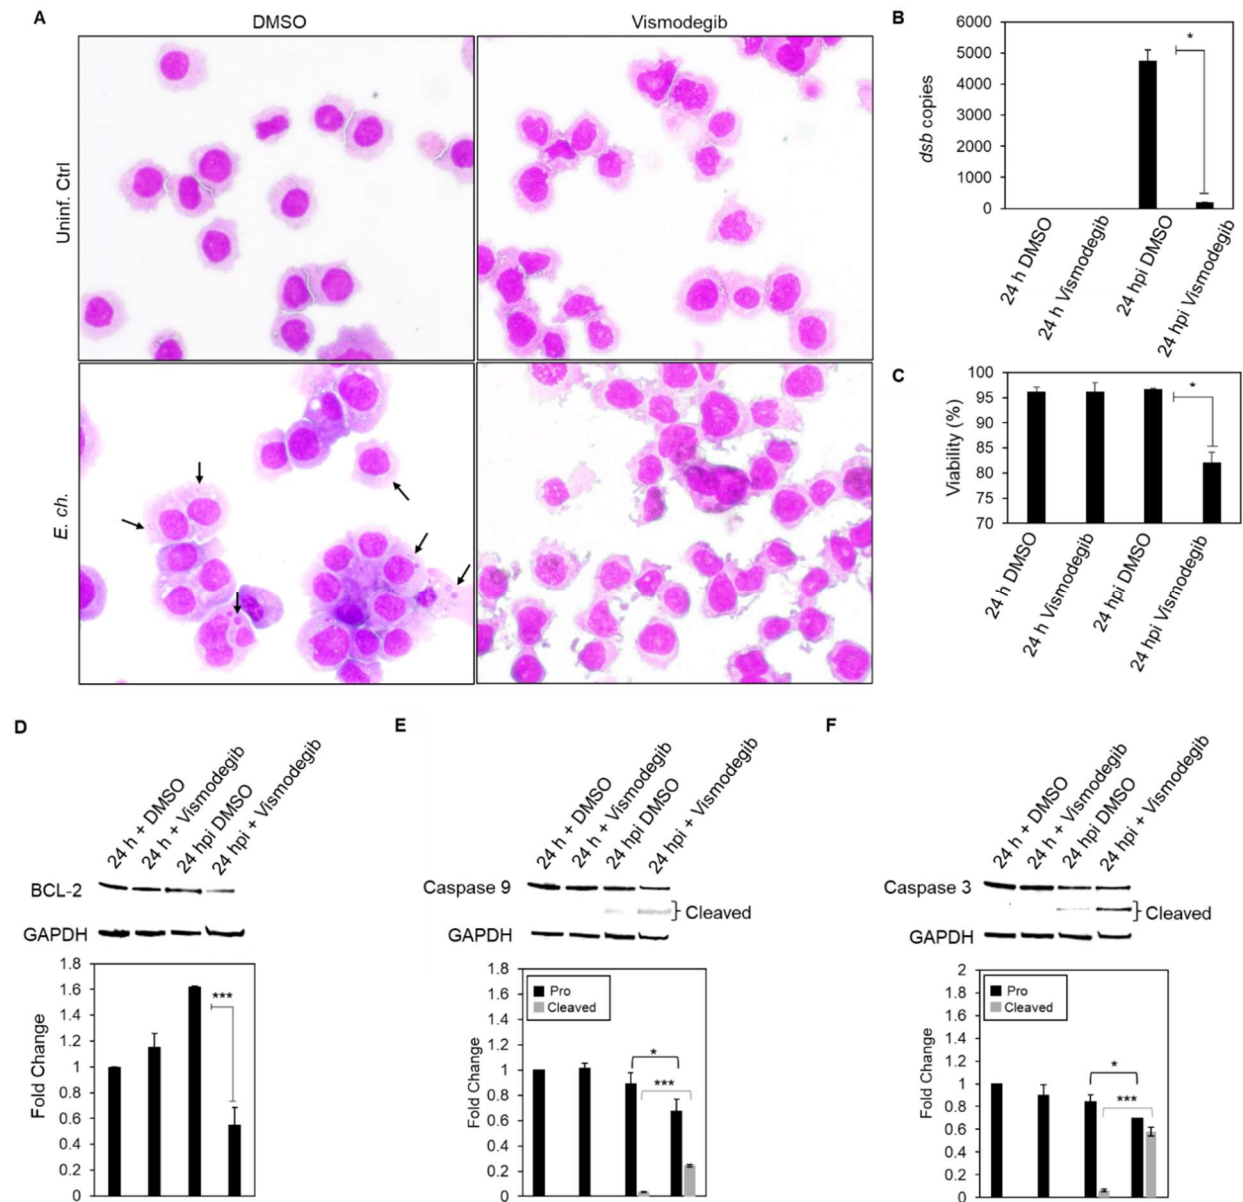

Fig. 13

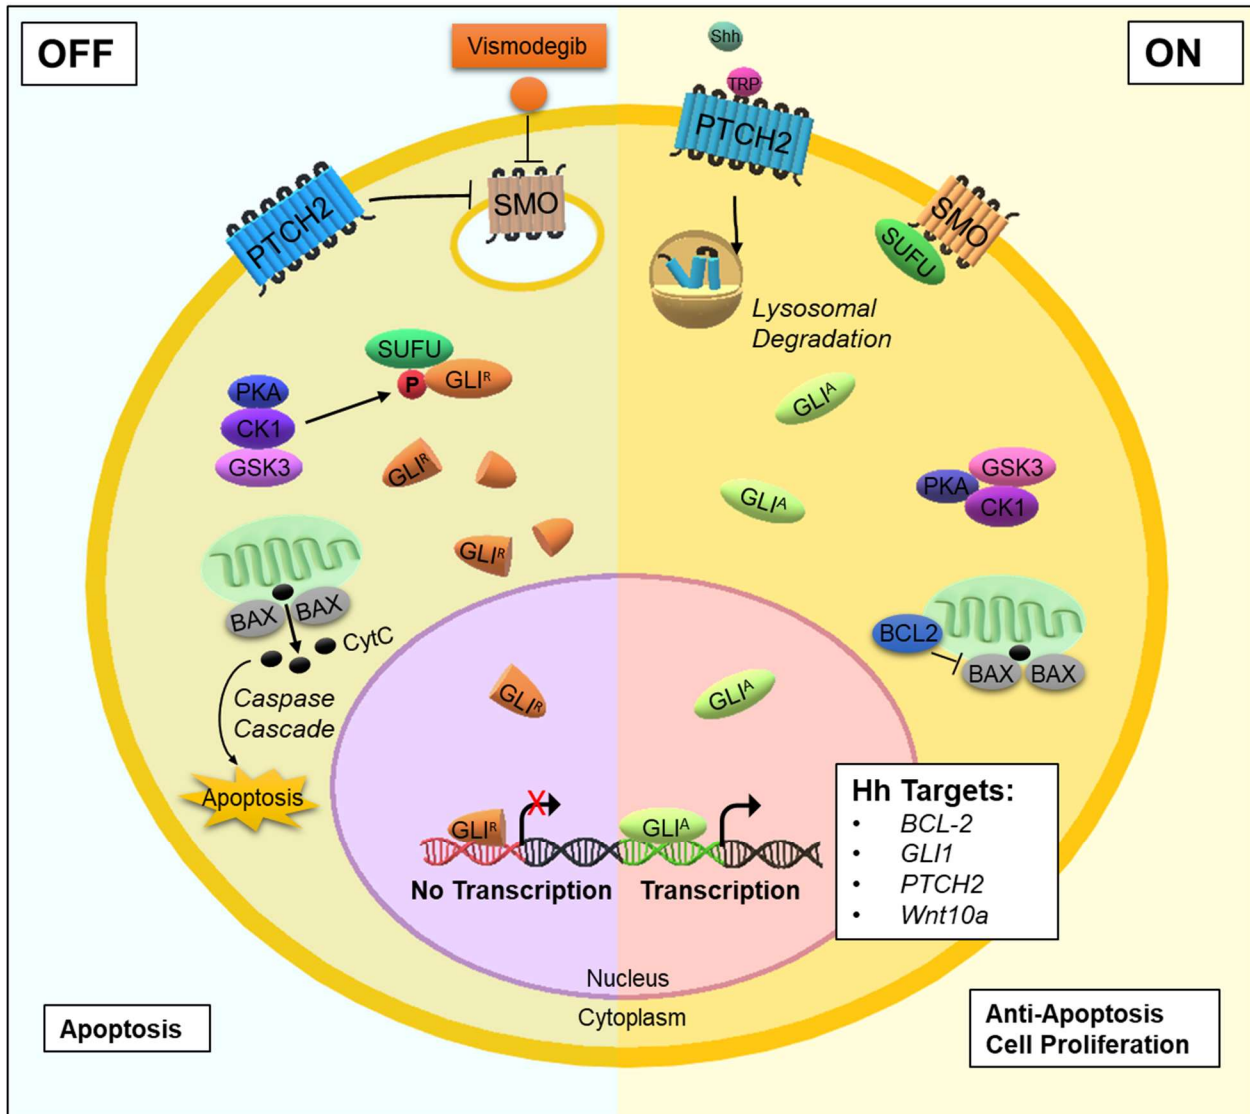

Source: https://www.biorxiv.org/content/10.1101/2022.02.08.479502v1.full.pdf
